# Deep Generative Models of Protein Structure Uncover Distant Relationships Across a Continuous Fold Space

Eli J. Draizen<sup>1,2\*</sup>, Stella Veretnik<sup>1</sup>, Cameron Mura<sup>1,2\*</sup>,  
Philip E. Bourne<sup>1,2</sup>

<sup>1</sup>School of Data Science, University of Virginia, Charlottesville, VA, USA.

<sup>2</sup>Department of Biomedical Engineering, University of Virginia,  
Charlottesville, VA, USA.

\*Corresponding author(s). E-mail(s): [edraizen@gmail.com](mailto:edraizen@gmail.com);  
[cmura@virginia.edu](mailto:cmura@virginia.edu);

## Abstract

Our views of fold space implicitly rest upon many assumptions that impact how we analyze, interpret and understand biological systems—from protein structure comparison and classification to function prediction and evolutionary analyses. For instance, is there an optimal granularity at which to view protein structural similarities (e.g., architecture, topology or some other level)? If so, how does it vary with the type of question being asked? Similarly, the discrete/continuous dichotomy of fold space is central in structural bioinformatics, but remains unresolved. Discrete views of fold space bin ‘similar’ folds into distinct, non-overlapping groups; unfortunately, such binning may inherently miss many remote relationships. While hierarchical databases like CATH, SCOP and ECOD represent major steps forward in protein classification, a scalable, objective and conceptually flexible method, with less reliance on assumptions and heuristics, could enable a more systematic and nuanced exploration of fold space, particularly as regards evolutionarily-distant relationships. Building upon a recent ‘Urfold’ model of protein structure, we have developed a new approach to analyze protein interrelationships. Termed ‘DeepUrfold’, this method is rooted in deep generative modeling via variational Bayesian inference, and we find it to be useful for comparative analysis across the protein universe. Critically, DeepUrfold leverages its deep generative model’s learned embeddings, which occupy high-dimensional latent spaces and can be distilled for a given protein in terms of an amalgamated representation that unites sequence, structure, biophysical and phylogenetic properties. Notably, DeepUrfold is structure-*guided*,

001  
002  
003  
004  
005  
006  
007  
008  
009  
010  
011  
012  
013  
014  
015  
016  
017  
018  
019  
020  
021  
022  
023  
024  
025  
026  
027  
028  
029  
030  
031  
032  
033  
034  
035  
036  
037  
038  
039  
040  
041  
042  
043  
044  
045  
046

047 versus being purely structure-based, and its architecture allows each trained  
048 model to learn protein features (structural and otherwise) that, in a sense,  
049 ‘define’ different superfamilies. Deploying DeepUrfold with CATH suggests  
050 a new, mostly-continuous view of fold space—a view that extends beyond  
051 simple 3D structural/geometric similarity, towards the realm of integrated  
052 *sequence* ↔ *structure* ↔ *function* properties. We find that such an approach can  
053 quantitatively represent and detect evolutionarily-remote relationships that  
054 evade existing methods.

055 **Availability:** Our results can be explored in detail at [https://bournelab.org/](https://bournelab.org/research/DeepUrfold)  
056 [research/DeepUrfold](https://bournelab.org/research/DeepUrfold). The DeepUrfold code is available at [http://www.github](http://www.github.com/bournelab/DeepUrfold)  
057 [.com/bournelab/DeepUrfold](http://www.github.com/bournelab/DeepUrfold), and associated data are available at [https://doi.org/](https://doi.org/10.5281/zenodo.6916524)  
058 [10.5281/zenodo.6916524](https://doi.org/10.5281/zenodo.6916524).

059 **Keywords:** deep learning; evolution; fold space; generative model; protein structure;  
060 protein classification; remote homology

061

062

063

064

065

066

067

068

069

070

071

072

073

074

075

076

077

078

079

080

081

082

083

084

085

086

087

088

089

090

091

092

## Introduction

The precise historical trajectory of the protein universe [1] remains quite murky, and likely corresponds to an evolution from (proto-)peptides, to protein domains, to multi-domain proteins [2]. Presumably, the protein universe—by which we mean the set of all unique protein sequences (known or unknown, natural or engineered, ancestral or extant)—did not spontaneously arise with intact, full-sized domains. Rather, smaller, sub-domain-sized protein fragments likely preceded more modern domains; the genomic elements encoding these primitive fragments were subject to natural evolutionary processes of duplication, mutation and recombination to give rise to extant domains found in contemporary proteins [2–6]. Our ability to detect common polypeptide fragments, shared amongst at least two domains (in terms of either sequence or structure), relies upon having (i) a similarity metric that is sensitive and accurate, and (ii) a suitable random/background distribution (i.e., null model) for distances under this metric; historically, such metrics have been rooted in the comparison of either amino acid sequences or three-dimensional (3D) structures, often for purposes of exploring protein fold space. The recent advent of high-accuracy structure prediction [7, 8], enabled by deep learning, presents new opportunities to explore fold space; to do so effectively requires new methods to accurately and sensitively detect weak/distant relationships.

## Fold Space, Structural Transitions & Protein Fragments

Fold space<sup>1</sup>, as the collection of all unique protein folds, corresponds to a many-to-one mapping: vast swaths of sequence space map to fold  $\mathcal{A}$ , another vast swath maps to fold  $\mathcal{B}$ , a narrower range might map to fold  $\mathcal{C}$ , and so on. Two proteins that are

---

<sup>1</sup>The term “protein structure space” (PSS) means the set of all protein 3D structures, known and unknown; the term “fold space” refers to the set of all protein folds. Though not strictly equivalent [12], we treat these terms interchangeably here unless noted otherwise.

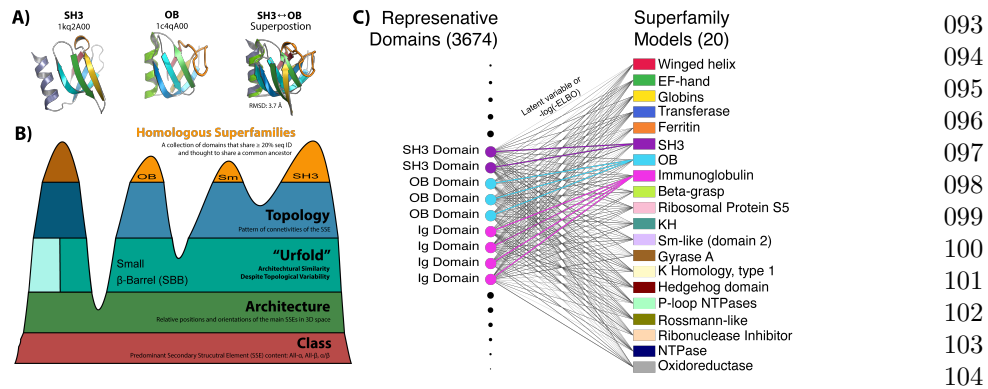

**Fig. 1 Overview of the UrFold model and DeepUrFold approach to identify domains that might reflect the phenomenon of “architectural similarity despite topological variability”.** (A) The SH3 and OB domains are prototypical members of the small  $\beta$ -barrel (SBB) urfold because they have the same barrel architecture, yet different strand topologies: they have strikingly similar 3D structures and share extensive functional similarities (e.g., PPI binding on the same edge-strand, involvement in nucleic acid-binding and processing pathways [9, 10]), yet these similarities are obscured by the SH3 and OB superfolds having been classified differently. In the case of the SBB urfold, the loops linking the strands are permuted in the SH3 and OB, yielding the different topologies seen in their 3D superposition. (B) If the UrFold phenomenon is viewed in terms of CATH, it is hypothesized to be a discrete structural entity or ‘level’ that lies between the Architecture and Topology strata, as schematized here. (C) DeepUrFold, which applies deep learning to the UrFold conceptualization of protein structure, identifies new potential urfolds by creating 20 SF-specific VAE neural network models and comparing output scores from all representative domains from those superfamilies (numbering 3,674) to every other SF model. As a metric to compute initially, we can imagine comparing the latent variables from domain representatives using models trained on the same SF (colored lines; see Fig. 3). Then, we can perform an all-vs-all comparison to begin mapping fold space, which we view as being organized as mixed-membership communities, versus hierarchically-clustered, mutually-exclusive bins; as detailed below and illustrated in Fig. 4, such communities can be computed via stochastic block models (SBMs; reviewed in [11]).

closely related (evolutionarily) might adopt quite similar folds ( $\mathcal{A}$ ,  $\mathcal{B}$ ), leading to their proximity in this high-dimensional space. Traditionally, fold space has been examined by hierarchically clustering domains based upon 3D structure comparison; in such approaches, whatever metric is used for the comparison can be viewed as structuring the space. The transition of a protein sequence from one fold to another, whether it be nearby ( $\mathcal{A} \rightarrow \mathcal{B}$ ) or more distant ( $\mathcal{A} \rightarrow \mathcal{C}$ ), and be it naturally (via evolution) or artificially (via design/engineering), likely occurs over multiple intermediate steps. These mechanistic steps include processes such as combining or permuting short secondary structural segments or longer regions (such as whole secondary structural elements [SSEs]), or mutating individual residues via nonsynonymous substitutions [5, 13–16]. In general, each such step may yield a new 3D structure, and that structure may correspond to the same or a different ‘fold’. Similarities across these transitional states,  $\mathcal{A} \rightarrow \mathcal{A}' \rightarrow \mathcal{A}'' \rightarrow \dots \rightarrow \mathcal{B}$ , blur the boundaries that delineate distinct groups—increasing or decreasing a relatively arbitrary and heuristic quantity, such as an RMSD or other similarity threshold, effectively alters the granularity of groupings in this space, and can change which structures belong to which groups. In this sense, the discrete versus continuous duality of fold space can be viewed largely as a matter of

139 semantics or thresholding, versus any ‘real’ (intrinsic or fundamental) feature of the  
140 space itself [17].

141 Despite their limitations, it was pairwise similarity metrics in structure space that  
142 first indicated remote connections in a continuous fold space via shared fragments  
143 (see [18] and references therein). In an early landmark study, Holm & Sander [19]  
144 created an all-by-all similarity matrix from 3D structural alignments and discovered  
145 that the protein universe harbors five peptide ‘attractors’, representing frequently-  
146 adopted folding motifs (e.g., the  $\beta$ -meander). Nearly a decade later, and armed with  
147 vastly more 3D structures, similar pairwise analyses across protein structure space  
148 showed that ‘all- $\alpha$ ’ and ‘all- $\beta$ ’ proteins are separated by ‘ $\alpha/\beta$ ’ proteins [20]. All-by-all  
149 similarity metrics applied to full domains (or fragments thereof) can be equivalently  
150 viewed as a graph-theoretic adjacency matrix, thus enabling the creation of a network  
151 representation of fold space. Such networks have been found to be “nearly connected”,  
152 linking various domains (graph nodes) in  $\approx 4$ -8 hops [21–23].

153 Graph-based representations of individual proteins have also motivated the study  
154 of common short (sub-domain) fragments. In pioneering studies, Harrison et al. [24, 25]  
155 found maximal common cliques of connected SSEs in a graph-based protein repre-  
156 sentation; their model took SSEs (helices, strands) as vertices and used the pairwise  
157 geometric relationships between SSEs (distances, angles, etc.) to decorate the graph’s  
158 edges. In that work, 80% of folds were found to share common cliques with other folds,  
159 and these were quantified by a new concept termed ‘gregariousness’.

160 Although short, sub-domain-sized peptide fragments have been thoroughly stud-  
161 ied, relatively few approaches have taken an evolutionary perspective, in the context  
162 of a continuous fold space. Goncarenco et al. [26] identified common loop frag-  
163 ments flanked by SSEs, called ‘*elementary functional loops*’ (EFLs), that couple in  
164 3D space to perform enzymatic activity. Youkharibache [6] noticed that peptide frag-  
165 ments, called ‘*protodomains*’, are often composed (with  $C_2$  internal symmetry) to give  
166 a larger, full-sized domain. More recently, Bromberg et al. identified common frag-  
167 ments between metal-binding proteins using ‘*sahle*’, a new length-dependent structural  
168 alignment similarity metric [4]. These studies underscore the functional (and thus  
169 evolutionary) roles of sub-domain structural fragments.

170 The two state-of-the-art, evolution-based fragment libraries that are currently  
171 available, namely ‘*primordial peptides*’ [2] and ‘*themes*’ [27], involved creation of a  
172 set of common short peptide fragments based on HHsearch [28] profiles for pro-  
173 teins in SCOP and ECOD, respectively. The sizes of the libraries created by these  
174 two sequence-driven approaches (40 primordial peptides, 2195 themes) vary greatly,  
175 reflecting different stringencies of thresholds (and, ultimately, their different goals).

176 Another approach to study shared, commonly-occurring sub-domain fragments is  
177 to represent a protein domain as a vector of fragments. For example, the *FragBag*  
178 method [29] describes a protein by the occurrence of fragments in a clustered fragment  
179 library [30]. A recent and rather unique approach, *Geometricus* [31], creates protein  
180 embeddings by taking two parallel approaches to fragmentation: (i) a  $k$ -mer based  
181 fragmentation runs along the sequence (yielding contiguous segments), while (ii) a  
182 radius-based fragmentation uses the method of spatial moment invariants to compute  
183 (potentially non-contiguous) geometric ‘fragments’ for each residue position and its  
184

neighborhood within a given radius, which are then mapped to ‘shape-mers’. Conceptually, this allowance for discontinuous fragments is a key step in allowing an algorithm to bridge more of fold space, as similarities between such non-contiguous fragments can imply an ancestral (contiguous) polypeptide that duplicated and lost one or more  $N'$ - or  $C'$ -terminal SSEs, perhaps in a “creative destruction” process that yields two different folds (i.e., different topologies) despite the preservance of similar architectures [5, 16].

## Limitations of Hierarchical Systems, and the Urfold

The conventional view of fold space as the constellation of all protein folds, grouped by their ‘similarities’ to one another, largely rests upon hierarchically clustering domains based upon 3D structure comparison, as exemplified in pioneering databases such as CATH [32], SCOP [33, 34], and ECOD [35]. Despite being some of the most comprehensive and useful resources available in protein science, these databases have intrinsic limitations that stem from their fundamental structuring scheme, reflecting assumptions and constraints of any hierarchical system (e.g., assigning a given protein sequence to one mutually exclusive bin versus others); in this design schema, domains with the same fold or superfamily (SF) cluster discretely into their own independent ‘islands’. The difficulty in smoothly traversing fold space, at least as it is construed by these databases—e.g., hop from island-to-island or create ‘bridges’ between islands in fold space—implies that some folds have no well-defined or discernible relationships to others. That is, we miss the weak or more indeterminate (but nevertheless *bona fide*) signals of remote relationships that link distantly-related folds. In addition to the constraints imposed by mutually exclusive clustering, the 3D structural comparisons used in building these databases generally rely upon fairly rigid spatial criteria, such as requiring identical topologies for two entities to group together at the finer (more homologous) classification levels. *What relationships might be detectable if we relax the constraints of strict topological identity?* As described below, this question is addressed by a recently proposed ‘Urfold’ model of protein structure [9, 12], which allows for sub-domain-level similarity.

Motivated by sets of striking structure $\leftrightarrow$ function similarities across disparate superfamilies, we recently identified relationships between several SFs that exhibit architectural similarity despite topological variability, in a new level of structural granularity that allows for discontinuous fragments and that we termed the ‘Urfold’ (Fig. 1B; [9, 12]). Urfolds<sup>2</sup> were first described in the context of small  $\beta$ -barrel (SBB) domains (Fig. 1A), based on patterns of structure $\leftrightarrow$ function similarity (as well as sequence signatures in MSAs, albeit more weakly) in deeply-divergent collections of proteins that adopt either the SH3/Sm or OB superfolds [9]. Notably, the SH3 and OB are two of the most ancient protein folds, and their antiquity is reflected in the fact that they permeate much of information storage and processing pathways (i.e., the transcription and translation apparatus) throughout all three domains of cellular life [16, 36, 37].

---

<sup>2</sup>We use the capitalized term ‘Urfold’ to refer to the concept/theory/model, as a general idea; the lowercase ‘urfold’ is used when we intend for that specific instance of the word to be limited to a specific case (e.g., “*the* SBB urfold”). Our goal is not to be dogmatic, but rather to be clear and precise as this new concept is being developed.

## 231 DeepUrfold: Motivation & Overview

232 The advent of deep learning [38], including the application of such approaches to pro-  
233 tein sequences and structural representations, affords opportunities to study protein  
234 interrelationships in a wholly new and different way—namely, via quantitative com-  
235 parison of ‘latent space’ representations of a protein in terms of its lower-dimensional  
236 ‘embedding’. Such embeddings can be derived at arbitrary levels of granularity (e.g.,  
237 atomic) and can subsume virtually any types of properties, such as amino acid type,  
238 physicochemical features (e.g., electronegativity), geometric attributes (e.g., surface  
239 curvature), phylogenetic conservation of sites, and so on. Two powerful benefits of  
240 such approaches are that (i) models can be formulated and developed in a statistically  
241 well-principled manner (or at least strive to be clear about their assumptions), and  
242 (ii) models have the capacity to be *integrative*, by virtue of the encoding (or ‘featuriza-  
243 tion’) of structural properties alongside phylogenetic, chemical, etc. characteristics of  
244 the data (in this case, augmenting purely 3D structural information about a protein).  
245 The methodology presented here explores the idea that viewing protein fold space in  
246 terms of feature embeddings and latent spaces (what regions are populated, with what  
247 densities, etc.)—and performing comparative analysis via such spaces (versus in direct  
248 or ‘real’ 3D/geometric space)—is likely to implicitly harbor deep information about  
249 protein interrelationships, over a vast multitude of protein evolutionary timescales.  
250 Such distant timescales are likely to be operative at the Urfold level of structure [12].

251 Here, we present a deep learning–based framework, ‘DeepUrfold’, to systematically  
252 identify urfolds by using a new alignment-free, topology-agnostic, biochemically-aware  
253 similarity metric of domain structures, based on deep generative models, together  
254 with mixed-membership community detection algorithms. From a probabilistic per-  
255 spective, our metric is rooted in the variational Bayesian inference that underpins  
256 variational autoencoders (VAEs [39]). From a deep learning perspective, our algo-  
257 rithm leverages embeddings and similarities in latent-space representations rather than  
258 simple (purely-geometric) 3D structures directly, enabling us to encode any sort of  
259 biophysical or other types of properties and thereby allowing more subtle patterns of  
260 similarities to be detected—such as may correspond to architectural similarities among  
261 (dis-)contiguous fragments from different folds, or even superfolds, that are related  
262 only at great evolutionary distances (Fig. 1C).

263 In brief, DeepUrfold’s four distinct methodological stages are: (i) *Dataset con-*  
264 *struction*, whereby 3D structures are prepared, featurized and allocated into suitable  
265 training/test splits for machine learning; (ii) *Training of SF-specific models*, using fea-  
266 turized protein structural data and a hybrid 3D-CNN/VAE-based deep network; (iii)  
267 *All-by-all inference calculations*, computing VAE-derived ELBO-based scores to assess  
268 the ‘fit’ of each 3D structural domain representative to each SF (i.e., subject each SF  
269 representative,  $i$ , to each SF-specific VAE model,  $j$ ); (iv) *Elucidation of any commu-*  
270 *nity structure* in these protein  $\leftrightarrow$  SF mappings, via stochastic block modelling of the  
271 patterns of scores.  
272

273  
274  
275  
276

## Results

### The DeepUrfold Computational Framework: Deep Generative Models

Conventionally, two protein structures that have similar architectures but varying topologies (i.e., folds) might be viewed as having resulted from convergent evolution. However, as in the case with the SH3 and OB superfolds, the *structure*  $\leftrightarrow$  *function* similarities [9], and even *sequence*  $\leftrightarrow$  *structure*  $\leftrightarrow$  *function* similarities [16], can prove to be quite striking, suggesting that these domain architectures did not arise independently [6, 16] but rather are echoes of a (deep) homology. To probe what may be even quite weak 3D similarities, in DeepUrfold we model the evolutionary processes giving rise to proteins as an integrated 3D structure/properties ‘generator’. In so doing, we seek to learn probability distributions,  $p(x|\theta)$ , that describe the specific geometries and physicochemical properties of different folds (i.e., features that largely define protein *function*), where the random variable  $x$  denotes a single structure drawn from ( $x \in \mathbf{x}$ ) a set of structures labelled as having the same fold ( $\mathbf{x}$ ), and  $\theta$  denotes the collection of model parameters describing the variational distribution over the background (i.e., latent) parameters. We posit that folds with similar latent space embeddings and learned probabilistic distributions—which can be loosely construed as “structure  $\leftrightarrow$  function mappings”, under our feature-set—likely have similar geometries/architectures and biophysical properties, regardless of potentially differing topologies (i.e., they comprise an urfold), and that, in turn, may imply a common evolutionary history.

Using the principles of variational inference [40], DeepUrfold learns the background distribution parameters  $\theta_i$  for superfamily distributions, i.e. models  $p_i(x_{ij}|\theta_i)$ , by constructing and training a variational autoencoder (VAE) model for each superfamily  $i$  and domain structure  $j$ . In the current work, DeepUrfold is developed using 20 highly-populated SFs from CATH (see Fig 1C and Supp Table 1). The original/underlying likelihood distribution,  $p_i(x_{ij}|\theta_i)$ , is unknown and intractable, but it can be estimated by considering an easier-to-approximate posterior distribution of latent space parameters,  $q_i(z_{ij}|\mathbf{x}_i)$ , where  $z$  denotes the latent variables we wish to infer and, again,  $\mathbf{x}$  is our data (protein structures); in our case, the approximating distribution  $q(z|\mathbf{x})$  is taken as sampling from a Gaussian. To ensure that  $q_i(z_{ij}|\mathbf{x}_i)$  optimally describes  $p_i(x_{ij}|\theta_i)$ , one can seek to maximize an *evidence lower bound* (ELBO) quantity as a variational objective, which supplies a lower bound of the marginal log-likelihood of a single structure,  $\ln[p_i(x_{ij})]$ . The ELBO inequality can be written as:

$$\ln[p_i(x_{ij})] \geq \mathbb{E}_{q_i(z_{ij}|\mathbf{x}_i)}[\ln p_i(x_{ij}|z_{ij})] - D_{\text{KL}}[q_i(z_{ij}|x_{ij}) || p(z_{ij})] \quad (1)$$

where  $p_i(x_{ij})$  is the likelihood,  $\mathbb{E}$  is the expectation value of  $q$  in terms of  $p$ , and  $D_{\text{KL}}[q||p]$  is the Kullback-Leibler divergence, or relative entropy, between the two probability distributions  $q$  and  $p$ . In other words, maximizing the ELBO corresponds to maximizing the expected log-likelihood of our learned model and minimizing the entropy or ‘distance’ ( $D_{\text{KL}}$ ) between (i) the true/exact underlying prior distribution of the data given a model,  $p(x|\theta)$ , and (ii) our learned/inferred approximation, as

323 a posteriori distribution of latent parameters given the data,  $q(z|\mathbf{x})$ . Pragmatically,  
 324 DeepUrfold’s variational objective is formulated as a minimization problem (Supp Info  
 325 §3), so we compute  $-(\text{ELBO})$  values.<sup>3</sup> In a similar vein, part of DeepUrfold’s testing  
 326 and development (detailed below) involved training “joint models” using a bag of SFs  
 327 with intentionally *different* topologies, e.g., a mixed SH3  $\cup$  OB set, while accounting  
 328 for the class imbalance [41, 42] that stems from there being vastly different numbers  
 329 of available 3D structural data for different protein SFs (e.g., immunoglobulin [Ig]  
 330 structures, which are disproportionately abundant). Further details of the multi-loop  
 331 permutation analyses used in testing and developing DeepUrfold can be found in Supp  
 332 Info §4.

333

334

335

336

337

338

339

340

341

342

343

344

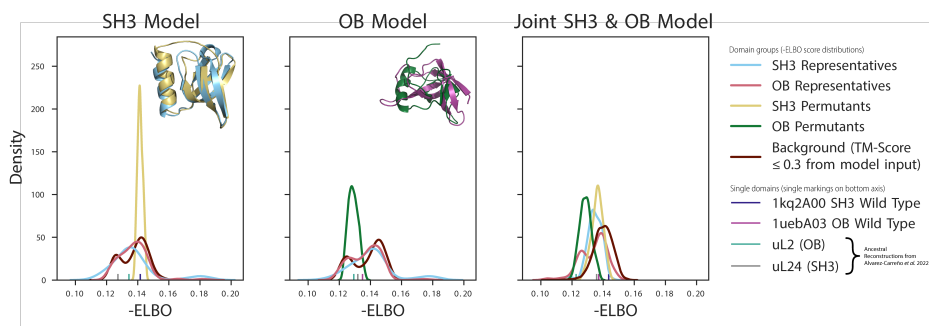

345 **Fig. 2 Likelihood-based ELBO values can quantify similarities among multi-loop per-**  
 346 **mutated structures.** To gauge the sensitivity of DeepUrfold’s VAE-based metric to loop orderings  
 347 (topology), we generated a series of fictitious folds and analyzed their patterns of scores. Specifically,  
 348 we implemented a multi-loop permutation algorithm [43] to systematically ‘scramble’ the SSEs found  
 349 in an SH3 domain (1k2A00) and an OB domain (1uebA03); in these loop ‘rewiring’ calculations, we  
 350 stitched together the SSEs and energetically relaxed the resultant 3D structures. While 96 unique  
 351 permutations are theoretically possible for a 4-stranded  $\beta$ -sheet [9], only 55 SH3 and 274 OB per-  
 352 muted domains were able to be modeled, presumably because their geometries lie within the radius  
 353 of convergence of MODELLER (e.g., the loop-creation algorithm did not have to span excessive dis-  
 354 tances in those cases). Each novel permuted structure was subjected to a DeepUrfold VAE model  
 355 that had been trained on all other domains from either SH3-only (left panel), (B) OB-only (middle),  
 356 or (C) joint SH3  $\cup$  OB domain (right) datasets. Fits to models were approximated by the  $-(\text{ELBO})$   
 357 score, which can be viewed as a similarity metric or a measure of ‘goodness-of-fit’ between an indi-  
 358 vidual structure and the SF-level VAE model trained via DeepUrfold. In reference to a given model,  
 359 a given permutant query structure having a  $-(\text{ELBO})$  less than its wild-type structure for that model  
 360 can be considered as structurally more ‘similar’ (a better fit) to the model, and thus perhaps more  
 361 thermodynamically or structurally stable. As reference points, we also include the  $-(\text{ELBO})$  scores for  
 362 ancestrally-reconstructed progenitors of the OB (uL2) and SH3 (uL24) superfolds, based on recent  
 363 work by Alvarez-Carreño et al. [16]; note that these latter data are single 3D structures (not dataset-  
 364 s/distributions of structures) subjected to a single inference pass through a trained VAE model,  
 365 and therefore they appear as thin vertical ‘tick’ lines along the horizontal axis. See Supp Info §4.2  
 366 and Supp Fig S8 for further discussion of these traces, including interpretations of the background  
 367 distributions (maroon traces) and the single-tick entities.

364 <sup>3</sup>This reasoning underlies the interpretation of Fig 2: Maximizing the ELBO equates to minimizing  
 365 DeepUrfold’s  $-(\text{ELBO})$  loss function, which is why a shift leftwards along the horizontal axis in Fig 2  
 366 corresponds to ‘better’ models. Similarly, more positive values of the  $-(\text{ELBO})$  quantity reflect poorer  
 367 agreement between a domain structure and the VAE model it is being subjected to in an inference calculation  
 368 (e.g., the single-tick marks in Fig 2); see also the analysis provided in Supp Info §4.2.



As input to the VAE, we encode the 3D structure of a protein domain by representing it as a 3D volumetric object, akin to the input used in 3D convolutional neural networks (CNNs). Indeed, DeepUrfold’s neural network architecture can be viewed as a hybrid/stacked 3D CNN-based VAE. In our discretization, atoms are binned into volumetric elements (voxels), each of which can be tagged or labeled, atom-wise, with arbitrary properties (biophysical, phylogenetic, etc.). A critical point is that this representation scheme is agnostic of polypeptide chain topology, as the covalent bonding information between residues, and the order of SSEs, is not explicitly retained; note, however, that no information is lost by this representation, as such information is implicit in the proximity of atom-occupied voxels in a model (and can be used to unambiguously reconstruct a 3D structure). The above preparatory and featurization steps utilized ‘Prop3D’, a computational toolkit that we have developed for machine learning with protein structures [44].

Note that we do not use VAEs to generate new samples from a given SF per se. Rather, the role of the VAE in DeepUrfold can be viewed as that of an anomaly detection tool, to robustly and quantitatively address the question: “Based on learned, superfamily-specific latent space representations, what is the likelihood that a given domain structure (from any SF,  $i$ ) arose from (or, alternatively, *was generated by*) a particular SF-specific VAE model,  $j$ ?”.

## DeepUrfold Models Can Detect Similarities among Topologically-distinct, Architecturally-similar Proteins

To initially assess our SH3, OB and joint SH3/OB DeepUrfold models—and to examine the properties of the Urfold model more broadly—we directly probed the Urfold’s core concept of “*architectural similarity despite topological variability*”. This test was performed by considering sets of artificial protein domains that have identical architectures but with specifically introduced loop permutations; we obtained these systematically engineered perturbations of a 3D structure’s topology by ‘rewiring’ the SSEs (scrambling the loops), while retaining the overall 3D structure/shape (i.e., architecture). Specifically, (i) we systematically created permuted (fictitious) 3D structures starting with representative SH3 and representative OB domains (Supp. Fig. 7A) via structural modeling (including energetic relaxation), and (ii) we then subjected each of these rewired structures, in turn, to each of the SH3, OB and joint SH3/OB DeepUrfold models. The SH3/Sm and OB superfolds comprise the first-identified urfold [9], namely the small  $\beta$ -barrel (SBB). While SBBs typically have six SSEs (five strands and a helix), there are four ‘core’  $\beta$ -strands, meaning an SBB’s  $\beta$ -sheet can theoretically adopt one of at least 96 distinct loop permutations [9]; note that, based on the operational definitions/usage of the terms ‘topology’ and ‘fold’ in systems such as SCOP, CATH, etc., such engineered permutants almost certainly would be annotated as being from different homologous superfamilies, implying no evolutionary relatedness. Thus, the loop-scrambling approach described here is a systematic way to gauge DeepUrfold’s ability to discern similarities at the levels of architecture and topology, in a self-contained manner that is agnostic of preexisting classification schemes such as CATH.

415 In general, we find that the synthetic/permutated domain structures have similar dis-  
416 tributions of  $-(\text{ELBO})$  scores as the corresponding wild-type domains (Fig 2). Those  
417 permutated domain structures with  $-(\text{ELBO})$  scores more negative than the wild-type  
418 domains (i.e., distributions that shift leftward in Fig 2 and Supp Fig S8) can be  
419 interpreted as being more similar (structurally, biophysically, etc.) to the DeepUrfold  
420 variational model (a ‘consensus’ model, of sorts<sup>4</sup>), and thus perhaps more thermody-  
421 namically stable or structurally robust were they to exist in reality—an interesting  
422 possibility as regards protein design and engineering. In terms of more conventional  
423 structural similarity metrics, the TM-scores [45] for permutated domain structures  
424 against the corresponding wild-type topolog (Supp Fig S7a) typically lied in the range  
425  $\approx 0.3-0.5$ —i.e., values which would indicate that the permutants and wild-type are  
426 not from identical folds, yet are more than just randomly similar (Supp Fig S7b).

427 The findings from these test calculations suggest that the DeepUrfold model is  
428 well-suited to our task because our encoding is agnostic to topological connectiv-  
429 ity information and, rather, is sensitive only to 3D spatial architecture/shape. Even  
430 though polypeptide connectivity is implicitly captured in our discretization, our Deep-  
431 Urfold model intentionally does not consider if two residues are linked by a peptide  
432 bond or if two spatially proximal SSEs are contiguous in sequence. The generality  
433 of this approach is useful in finding similarities amongst sets of seemingly dissimilar  
434 3D structures—and thereby identifying specific candidate urfolds—because two sub-  
435 domain portions from otherwise rather (structurally) different domains may be quite  
436 similar to each other, even if the domains which they are a part of have different  
437 (domain-level) topologies but identical overall architectures. This concept can be rep-  
438 resented symbolically: for an arbitrary subset of SSEs,  $d$ , drawn from a full domain  
439  $\mathcal{D}$ , the Urfold model permits relations (denoted by the ‘ $\sim$ ’ symbol) to be detected  
440 between two different ‘folds’,  $i$  and  $j$  (i.e.  $d_i \sim d_j$ ), at the sub-domain level, without  
441 requiring that the relation also be preserved with the stringency of matched topolo-  
442 gies at the higher ‘level’ of the full domain. That is,  $d_i \sim d_j \not\Rightarrow \mathcal{D}_i \sim \mathcal{D}_j$ , even though  
443  $d_i \subset \mathcal{D}_i$  and  $d_j \subset \mathcal{D}_j$  (in contrast to how patterns of protein structural similarity  
444 are traditionally conceived, at the domain level). Here, we can view the characteristic  
445 stringency or ‘threshold’ level of the Urfold, ‘ $d$ ’, as being near that of architecture,  
446 while  $\mathcal{D}$  reflects both architecture *and* topology (corresponding to the classical usage  
447 of the term ‘fold’).

448

## 449 Latent Spaces Capture Gross Structural Properties Across 450 Many Superfamilies, and Reveal a Highly Continuous Nature 451 of Fold Space

452

453 The latent space of each superfamily-level DeepUrfold model offers a new, nuanced  
454 view of that superfamily, and examining the patterns of similarities among such models  
455 may offer a uniquely informative view of fold space. Each SF-specific model captures  
456 the different 3D geometries and physicochemical properties that characterize that indi-  
457 vidual SF as a single ‘compressed’ data point or embedding; in this way, the latent  
458

---

459 <sup>4</sup>In the sense that DeepUrfold’s likelihood-based scores can be viewed as measures of the goodness-of-fit  
460 of protein domain structures to VAE models that are learnt, against the variational objective, at the SF  
level.

space representation (or ‘distillation’) is more comprehensible than is a full 3D domain structure (or superimpositions thereof). In a sense, the DeepUrfold approach—and its inherent latent space representational model of protein SFs, with featurized proteins—can reconcile the dichotomy of a continuous versus discrete fold space because the Urfold model (i) begins with no assumptions about the nature of fold space (i.e., patterns of protein interrelationships), and (ii) does not restrictively enforce full topological ordering as a requirement for a relation to be detected (even a rather weak one) between two otherwise seemingly unrelated domains (e.g.,  $d_i^{\text{SH3}} \sim d_j^{\text{OB}}$  is not forbidden, using the terminology introduced above). We posit that DeepUrfold can detect these weak similarities (i.e., exhibit high sensitivity) because it operates on protein domains that are featurized beyond purely 3D spatial coordinates; our rationale here is that molecular evolution acts on proteins holistically, not on merely their 3D geometries.

As a first view of fold space through the lens of the Urfold, we used DeepUrfold to represent/compute and analyze the latent spaces of representative domains for highly populated SFs, including mapping the latent space embeddings into two dimensions (Fig 3). Proteins that share similar geometries and biophysical properties should have similar embeddings, and would be expected to lie close together in this latent-space representation, regardless of the annotated ‘true’ SF. Though this initial picture of the protein universe is limited to 20 highly populated CATH SFs (in this work), already we can see that these SF domains appear to be grouped and ordered by secondary structure composition (Fig 3)—a result that is consistent with past analyses which used approaches such as multidimensional scaling to probe the overall layout of fold space (e.g., [20]). Variable degrees of intermixing between SFs can be seen in UMAP projections such as illustrated in Fig. 3; this is a compelling finding, with respect to the Urfold and its relaxed notion of allowing for intermixed superfamilies. In addition to this mixing, the latent space projection is not punctate: rather than consist of clearly demarcated, well-separated ‘islands’, instead it is fairly ‘compact’ (in a loose mathematical sense) and well-connected, with only a few disjoint outlier regions. Manual inspection of these outlier domain structures shows that many of them are incomplete sub-domains or, intriguingly, a single portion of a larger domain-swapped region [46]. Together, these findings support a rather continuous view of fold space, at least for these 20 exemplary superfamilies.

While each superfamily model is trained independently, with different domain structures (SH3, OB, etc.), we find that the distributions that the VAE-based SF models each learn—again, as ‘good’ approximations to the true likelihood,  $p_i(x_{ij}|\theta_i)$ —are similar, in terms of the dominant features of their latent spaces. In other words, the multiple VAE models (across each unique SF) each learn a structurally low-level, ‘coarse-grained’ similarity that then yields the extensive overlap seen in Fig. 3. When colored by a score that measures secondary structure content, there are clear directions along which dominant features of the latent-space can be seen to follow, as a gradient from ‘all- $\alpha$ ’ domains to ‘all- $\beta$ ’ domains, separated by ‘ $\alpha/\beta$ ’ domains. These findings are consistent and reassuring with respect to previous studies of protein fold space (e.g., [20]), as well as the geometric intuition that the similarity between two

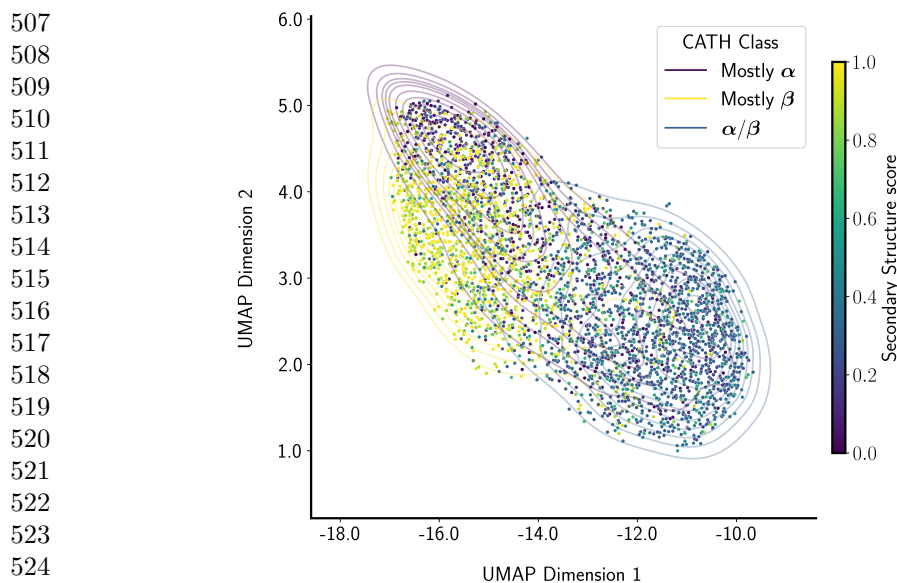

**Fig. 3 Dominant variables of DeepUrfold’s latent-space models capture gross structural properties and indicate a highly continuous fold space.** In a pilot study, we used DeepUrfold to develop 20 distributions/models for 20 CATH homologous superfamilies. Representatives from each SF were subjected to deep models that were trained on domains from the same SF, and then the latent space variables for each structural domain were examined via the uniform manifold approximation and projection (UMAP) method, thereby reducing the 1024 dimensions of the actual model to the two-dimensional projection shown here. In this representation, kernel density estimates (isodensity contour lines) surround domains with the same annotated CATH *Class*. Each domain is colored by a secondary structure score; computed as  $(\frac{1}{2}(\#\beta \text{ atoms} - \#\alpha \text{ atoms})/(\#\beta \text{ atoms} + \#\alpha \text{ atoms}) + 0.5)$ , this score ranges from zero (for all- $\alpha$ ) to unity (for all- $\beta$ ). The protein domains here, as captured in DeepUrfold, can be seen to group together by secondary structure composition; moreover, they are roughly ordered, with the  $\alpha/\beta$  region extensively overlapping the mostly- $\beta$  region (yellow, predominantly in the vertical direction) and mostly- $\alpha$  region (purple, running predominantly horizontally).

537 domains would roughly track with their secondary structural content (e.g., two arbitrary all- $\beta$  proteins are more likely to share geometric similarity than would an all- $\beta$  and an all- $\alpha$ ).

### 541 Protein Interrelationships Defy Discrete Clusterings

542  
543 Our initial finding that fold space is rather continuous, at least under the DeepUrfold model, implies that there are, on average, webs of interconnections (similarities, relationships) between a protein fold  $\mathcal{A}$  and its neighbors in fold space ( $\mathcal{A}'$ ,  $\mathcal{A}''$ ,  $\mathcal{B}$ , ...). Therefore, we posit that an optimally realistic view of the protein universe will not entail hierarchically clustering proteins into mutually exclusive bins, regardless of whether such binning is based upon their folds (giving *fold space*) or any other relatively simple (standalone) geometric feature/criterion. Alternatives to discrete clustering could be such approaches as *fuzzy clustering*, *multi-label classification*, or *mixed-membership community detection* algorithms. DeepUrfold’s strategy is to detect communities of similar protein domains, at various levels of stringency, based

on the quantifiable similarities of their latent-space representations (versus, e.g., hierarchical clustering based on RMSD or other purely-geometric measures). Again, this is possible because we are armed with a battery of ELBO-based scores of the ‘fit’ of each SF domain representative to each of the top 20 SF VAE models (Fig 1C).

In DeepUrFold, we formulate this labeling/classification/grouping task as a problem in nonparametric Bayesian stochastic block modelling (SBM; [47, 48]). In particular, we fit an edge-weighted [49], degree-corrected, mixed-membership [50, 51], hierarchical [52] SBM to a fully connected bipartite graph that is built from the similarity scores between (i) the VAE-based SF-level models (one side of the bipartite graph) and (ii) representative structural domains from the representative SFs (the other side of the bipartite graph), as schematized in Fig 1C. In our case, we capture the ‘fit’ between a domain representative and a particular SF (more precisely, that SF’s VAE model) by weighting each edge by the quantity  $-\log(-(\text{ELBO}))$  (see Fig 1 and Eq 1). The motivation for this approach is that the full, global collection of  $-(\text{ELBO})$ -weighted protein interrelationships (again, between SFs and domain representatives) most naturally corresponds to a bipartite graph, or network, which can be represented by its adjacency matrix,  $\mathbf{A}_{d \times sfam}$ ; this matrix features covariate edge weights  $\mathbf{x}$  that link vertices from the two ‘sides’ of the bipartite graph, where  $sfam \in 20$  highly-populated SFs and  $d \in 3,674$  representative domains from the 20 SFs. Following Peixoto [49], we can write the full joint probability of a given bipartite graph/network occurring by chance—with precisely the same vertices connected by the same edges, with the same weights—as the following product over distributions of data and model parameters:

$$P(\mathbf{A}, \mathbf{x}, \gamma, \mathbf{G}, \mathbf{k}, \mathbf{e}, \mathbf{b}) = P(\mathbf{A}|\mathbf{G})P(\mathbf{x}|\mathbf{G}, \gamma)P(\gamma|\mathbf{e}, \mathbf{b})P(\mathbf{G}|\mathbf{k}, \mathbf{e}, \mathbf{b})P(\mathbf{k}|\mathbf{e}, \mathbf{b})P(\mathbf{e}|\mathbf{b})P(\mathbf{b}) \quad (2)$$

where  $\mathbf{b}$  is the overlapping partition that represents the numbers of blocks (protein communities) and their group memberships (which nodes map to which blocks),  $\mathbf{e}$  is a matrix of edge counts between the groups (thus allowing for mixed-membership between blocks),  $\mathbf{k}$  is the labelled degree sequence, and  $\mathbf{G}$  is a tensor representing the labeling of half-edges (each edge end-point  $r, s$ ) to account for mixed-membership, satisfying the constraint  $A_{ij} = \sum_{rs} G_{ij}^{rs}$ . The edge covariate parameters  $\mathbf{x}$  (e.g., ELBO-based scores) are sampled from a microcanonical distribution,  $P(\mathbf{x}|\mathbf{G}, \gamma)$ , where  $\gamma$  imposes a hard constraint such that  $\sum_{ij} G_{ij}^{rs} x_{ij} = \gamma_{rs}$  (Sec. VIIC of [47] and personal communication with T. Peixoto). We seek an SBM that best captures  $\mathbf{A}$ , where ‘best’ is meant as the usual trade-off between model accuracy (to the observed data) and model simplicity (i.e., mitigating overparametrization). An optimal SBM is obtained by considering this as a nonparametric Bayesian inference problem, meaning that (i) model features (the number of groups/blocks, node membership in blocks, patterns of edges between nodes and between groups, etc.), as well as (ii) model parameters and hyperparameters that are sampled over (marginalized out, via integration), are not set *a priori* but rather are determined by the data itself.

We estimate the optimal parameters for a given SBM via Markov chain Monte Carlo (MCMC) methods. Several different models are created for different  $\mathbf{b}$  and  $\mathbf{e}$  in order to find the optimal number of blocks with overlapping edges between them, and these are evaluated using a posterior odds-ratio test [50, 51].

599 Armed with the above SBM methodology, we can now summarize DeepUrfold’s  
 600 overall approach as consisting of the following four stages: (i) Dataset construction,  
 601 e.g. via the aforementioned discretization of 3D structures and biophysical properties  
 602 into voxelized representations [44]; (ii) Training of SF-specific models, using our hybrid  
 603 stacked 3D-CNN/VAE-based deep networks; (iii) In an inference stage, calculation  
 604 of ELBO-based scores for ‘fits’ obtained by subjecting SF representative  $i$  to the  
 605 VAE models of all other SFs,  $j$ ; (iv) To decipher any patterns amongst these scores,  
 606 utilization of SBM-based analysis of ‘community structure’ within the complete set of  
 607 similarity scores for the VAE-based SF-level models (i.e., the full bipartite network,  
 608  $SF_i \times model_j$ ).

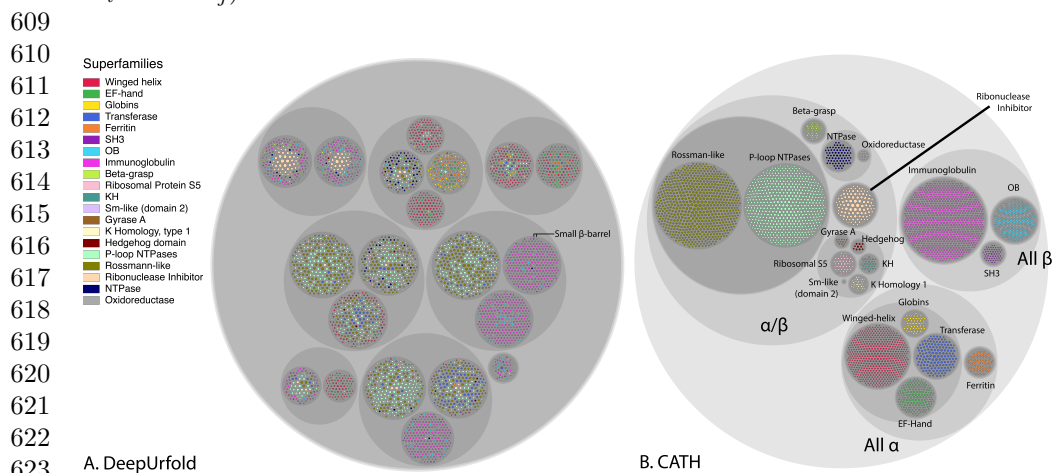

624 **Fig. 4 Protein interrelationships defy discrete clusterings: Stochastic block modeling of**  
 625 **an all-vs-all comparison of domain structures and superfamily models.** Here, we depict (A)  
 626 the SBM communities predicted by DeepUrfold as a circle packing diagram, following a similar repre-  
 627 sentational scheme as for (B) the CATH hierarchy. While DeepUrfold avoids hierarchical clustering,  
 628 we display the groupings in this manner for the sake of visual representation and to facilitate compar-  
 629 ison to CATH. Each domain representative is drawn as an innermost circle (corresponding to leaves  
 630 in a hierarchical tree), colored by the annotated CATH SF and sized by the number of atoms. All of  
 631 the SF labelled nodes were found to cluster together and were removed from this list (Supp. Fig. 15).  
 632 Note that many SH3 and OB domains lie within the same lowest-level communities (labeled ‘Small  
 633  $\beta$ -barrel’ in (A)), showing that DeepUrfold can detect the link between these folds, as posited in the  
 634 Urfold model. Indeed, comparison of the patterns of groupings in (A) to the CATH hierarchy in (B)  
 635 reveals that DeepUrfold is learning a rather different, non-hierarchical map of protein relationships.

636 Application of this DeepUrfold methodology to the 20 most highly-populated  
 637 CATH superfamilies leads us to identify many potential communities of domain struc-  
 638 tures and SFs (Fig. 4). Subjecting all domain representatives to all 20 SF-specific  
 639 models, in an exhaustive  $all_{SF-models} \times all_{SF-reps}$  analysis, reveals the global commu-  
 640 nity structure shown in Fig. 4. We argue that two proteins drawn from vastly different  
 641 SFs (in the sense of their classification in databases such as CATH or SCOP) can  
 642 share other, more generalized (e.g., non-contiguous) regions of geometric/structural  
 643 and biophysical properties, beyond simple permutations of secondary structural ele-  
 644 ments. And, we believe that the minimally-heuristic manner in which the DeepUrfold  
 model is constructed allows it to capture such ‘distant’ linkages. In particular, these

linkages can be identified and quantitatively described as patterns of similarity in the DeepUrfold model’s latent space. Organizing protein domains and superfamilies based on this new similarity metric provides a new view of protein interrelationships—a view that extends beyond simple structural/geometric similarity, towards the realm of integrated *sequence* ↔ *structure* ↔ *function* properties.

We find that domains that have similar  $-(ELBO)$  scores against various superfamily models (differing from the SF against which they were trained) are more likely to contain important biophysical properties at particular—and, presumably, functionally important—locations in 3D space; these consensus regions/properties can be thought of as ‘defining’ the domain.<sup>5</sup> Furthermore, if two domains map into the same SBM community, it is likely that both domains share the same scores when run through each SF model (i.e., an inference calculation), so we hypothesize that that community might contain an urfold that subsumes those two domains (again, agnostic of whatever SFs they are labeled as belonging to in CATH or other databases). We also expect that some domains (those which are particularly ‘gregarious’?) may be in multiple communities, which may reflect the phenomenon of a protein being constructed of a multifarious ‘urfold’ or of several sub-domain elements. Because of the conceptual difficulties and practical complexities of analyzing, visualizing and otherwise representing such high-dimensional data, in the present work we show only the single most likely cluster that each protein domain belongs to, while emphasizing that multi-class membership is a key property of DeepUrfold’s approach.

Given the stochastic nature of the SBM calculation, we ran six different replicates. While each replica produced slightly different hierarchies and numbers of clustered communities (ranging from 19-23), the communities at the lowest (coarsest) level remained consistent, and exhibited varying degrees of intermixing. Notably, in each of the replicates the SH3 and OB clustered into the same communities, and likewise the Rossman-like and P-loop NTPases did too, instead of exclusively occupying their own individual clusters; this finding is consistent with the Urfold view of these SFs, as predicted based on manual/visual analysis [12]. In Fig. 4, we chose to display the replica with 20 SFs and highest overlap score compared to CATH in order to enable easy comparison to and reference to CATH. Most notably, each community contains domains from different superfamilies (Fig. 4A), consistent with the Urfold model of protein structure. In the particular subset of proteins treated here, the domains from ‘mainly  $\alpha$ ’ and ‘ $\alpha/\beta$ ’ are preferentially associated, while domains from ‘mainly  $\beta$ ’ and ‘ $\alpha/\beta$ ’ group together (Fig. 4B); members of the SH3 and OB superfolds cluster together in the same communities (Fig. 4A), corresponding to the first proposed urfold, the SBB [9].

In addition to coloring each domain (node) by its preexisting CATH superfamily label in circle-packing diagrams, such as that of Fig. 4, we also explored coloring domain nodes by other basic types of properties. These additional properties included: (i) secondary structure type, (ii) average electrostatic potential, (iii) average partial charge, and (iv) enriched gene ontology (GO) terms (Supp Figs S16-21); a navigable, web-based interface for exploring these initial DeepUrfold results is freely available

---

<sup>5</sup>In some sense, these ‘defining regions’ may play analogous roles in protein domains as do *tokens* in natural language modeling and generation via large language models such as the generative pre-trained transformers (GPT-n series).

691 at <https://bournelab.org/research/DeepUrfold/>. Interestingly, domains with similar  
692 average electrostatic potentials (Supp Fig S16) and partial charges (Supp Fig S17)  
693 can be found to associate into similar groups in DeepUrfold, whereas the CATH-based  
694 circle-packing diagrams, when colored by those same features, have no discernible  
695 order or structuring; whether or not this phenomenon stems from any underlying,  
696 functionally-relevant ‘signal’ is a question of interest for further work.

697 In order to assess how ‘well’ our DeepUrfold model does, we compare and contrast  
698 our clustering results with CATH. However, we emphasize that there is no reliable,  
699 objective ground truth for a map of fold space, as there is no universally-accepted,  
700 ‘correct’ description of fold space (and, it can be argued, even ‘fold’). Therefore, we  
701 cautiously compare our DeepUrfold results to a well-established system, like CATH,  
702 with the awareness that these are two conceptually different approaches to repre-  
703 senting and describing protein structure relationships and, thus, the protein universe.  
704 Indeed, because our model uses a fundamentally different input representation of pro-  
705 teins, intentionally ignoring all topological/connectivity information, we expect that  
706 our model will deviate from CATH in terms of clustering-related measures such as  
707 *completeness*, *homogeneity*, *silhouette score*, and *partition overlap* [51]. Given all this,  
708 approaches that do differ from CATH—versus matching or recapitulating it—can be  
709 considered as representing an alternative view of the protein universe. Somewhat coun-  
710 terintuitively, we deem weaker values of our comparison metrics (e.g., less similarity  
711 to CATH) as providing stronger support for the Urfold model of protein structure.  
712 Simultaneously, we systematically compared how well other, independently-developed  
713 sequence- and structure-based models can reconstruct CATH (Fig 5); in so doing, we  
714 included a random baseline model as a sort of ‘negative control’ in gauging the per-  
715 formance of the DeepUrfold framework (Fig. 5 and Supp Info §6.9). Among all these  
716 methods, our DeepUrfold approach produces results that are the most divergent from  
717 CATH, consistent with DeepUrfold’s approach of taking a wholly new view of the pro-  
718 tein universe and the domain-level structural similarities that shape it. We also see that  
719 many other algorithms, both sequence-based (Fig. 5, left) and structure-based (Fig. 5,  
720 right), have difficulty reconstructing CATH (possibly due to extensive manual cura-  
721 tion of CATH), but much more closely reproduce it than does our method. We suspect  
722 that this largely occurs because of DeepUrfold’s intentional, low-level incorporation  
723 and integration of more *types* of information than purely 3D structural geometry.

724

## 725 Discussion, Further Outlook

726

727 This work offers a new, structure-guided, community-based view of protein rela-  
728 tionships. Using a deep learning-enabled framework that we term *DeepUrfold*, our  
729 approach aims to (i) explore and assess the Urfold model of protein structure rela-  
730 tionships [12], in a rigorous/quantitative manner, and (ii) develop a platform for  
731 systematically identifying putative new urfolds. The following are key features of the  
732 DeepUrfold framework: (i) It is sensitive to 3D structure and structural similarity  
733 between pairs of proteins, but is minimally heuristic (e.g., it does not rely upon pre-set  
734 RMSD thresholds or the like) and, crucially, it is topology-agnostic and alignment-  
735 free (as it leverages latent space embeddings of featurized structures, versus direct 3D  
736



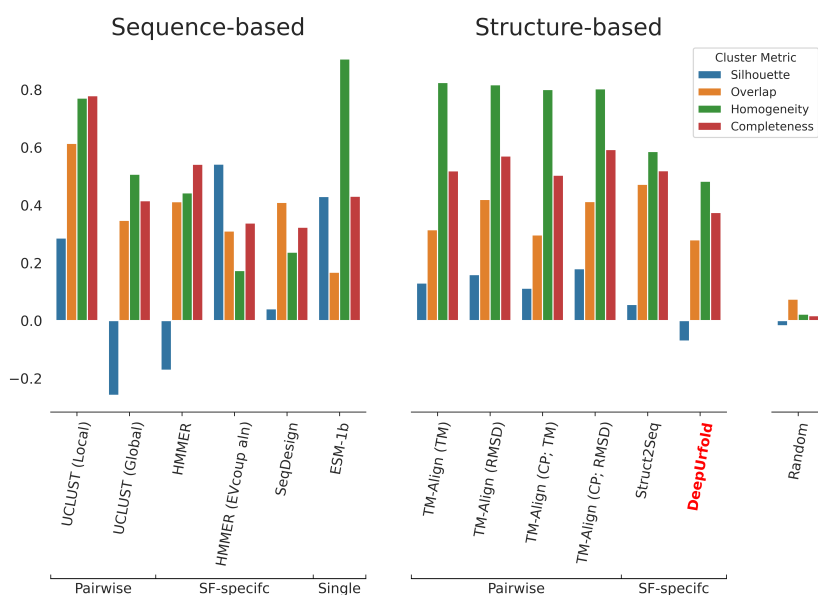

**Fig. 5 Comparing DeepUrfold and other methods to CATH.** We compare DeepUrfold to other sequence-based (left-half) and structure-based (right-half) protein similarity approaches by using each of them to attempt to reconstruct CATH’s organization of protein superfamilies. The scores from each of the algorithms, applied to the same protein dataset as used for DeepUrfold in this work, are used as edge weights to compute an SBM. In so doing, any score types that would increase with decreasing similarity (i.e., correspond to a distance metric) were converted to a similarity metric by negation ( $-x$  or  $-\log x$ ). We take the communities at the lowest hierarchical level as clusters and use cluster comparison metrics to understand how well each algorithm/similarity metric can be used to recapitulate CATH. For each of these metrics (*silhouette* value, *overlap*, *homogeneity* and *completeness*), a value of unity is deemed best. DeepUrfold does ‘poorly’ with these metrics because it does not produce the same clustering patterns—in other words, it is learning something entirely different than are other algorithms, which more closely reproduce CATH. For TM-Align, ‘CP’ stands for Circular Permutation. We also compared a uniform random grouping for 20 groups as a baseline. For more detailed information, see Supp Info §6.9 and Supp Table S3.

coordinates, for comparison purposes). (ii) Beyond the residue-level geometric information defining a 3D structure (i.e. coordinates), DeepUrfold is an extensible model insofar as it can incorporate *any* types of properties of interest, so long as such data can be encoded as part of the ‘featurization’ in a deep model—e.g. biophysical and physicochemical characteristics (electrostatic charge, solvent exposure, etc.), site-by-site phylogenetic conservation, and so on. (iii) The DeepUrfold method provides a quantitative metric, in the form of the deep neural network’s loss function (at the inference stage), that is amenable to approaches that are more generalized than brute-force hierarchical clustering; for instance, this work shows that we can use loss function scores in stochastic block modeling to construct mixed-membership communities of proteins. In the above ways, DeepUrfold can be viewed as an integrative approach that, while motivated by structural (dis)similarities across fold space, is also cognizant of *sequence ↔ structure ↔ function* interrelationships—even those which are quite weak.

783 This is intentional: molecular evolution acts on the sequence/structure/function triad  
784 as its base ‘entity’, not on the purely geometric aspects of 3D structure alone. We sus-  
785 pect that any purely geometric/structure-based approach will be limited in its ability  
786 to accurately represent fold space (as also described in Supp Info §5.6).

787 Using the DeepUrfold methodology, we demonstrate (i) the general utility of a new  
788 type of similarity metric for representing and comparing protein domain structures,  
789 based on deep generative models and latent spaces, and (ii) that a mixed-membership  
790 community detection algorithm can identify what we previously found, via manu-  
791 al/visual analysis [12], to be putative urfolds. Finally, we emphasize that because  
792 DeepUrfold is agnostic of precise protein topology (i.e., order of connectivity of SSEs  
793 in 3D-space), it can readily detect levels of similarity ‘above’ the fold level (above  
794 CATH’s ‘T’ level, below its ‘A’ level), including the potential of non-contiguous  
795 fragments. We believe that such spatially-compact groups of frequently recurring sub-  
796 domain fragments, sharing similar architectures (independent of topology) within a  
797 given group—which, again, we term an ‘urfold’—could correspond to primitive ‘design  
798 elements’ in the early evolution of protein domains [22]. We note that Kolodny [53]  
799 has made similar points.

800 Overall, the DeepUrfold framework provides a sensitive approach to detect and  
801 thus explore distant protein interrelationships, which we suspect correspond to weak  
802 phylogenetic signals (perhaps as echoes of remote/deep homology). Also notable, the  
803 embeddings produced by our VAE models and ELBO-based similarity scores provide  
804 new methods to visualize and interpret protein interrelationships on the scale of a  
805 full fold space. From these models, it is clear that there is a fair degree of continuity  
806 between proteins in fold space, and intermixing between what has previously been  
807 labeled as separate superfamilies; a corollary of this finding is that discretely clustering  
808 proteins, or their embeddings, is ill-advised [54] from this perspective of a densely-  
809 populated, smoother-than-expected fold space. An open question is the degree to  
810 which the extent of overlap between individual proteins (or groups of domains, as an  
811 urfold) in this fold space is reflective of underlying evolutionary processes, e.g. akin  
812 to Edwards & Deane’s finding [21] that “evolutionary information is encoded along  
813 these structural bridges [in fold space]”.

814 While the present work focused exclusively on developing DeepUrfold with CATH  
815 as a backdrop, it also would be intriguing to assess other classification schemes as  
816 contexts for DeepUrfold-based VAE models—specifically, SCOP, SCOP2 and ECOD.  
817 SCOP2 is particularly interesting because it aims to represent sub-domain-level  
818 similarities and evolutionarily-distant functional relationships by relaxing the strict  
819 constraints of hierarchical trees in favor of a graph-based approach to relationships  
820 [33]. A comparative analysis of DeepUrfold groupings (e.g., from the SBM) and SCOP2  
821 groupings, in order to gauge any clear and easily identifiable points of concordance  
822 between these approaches, would be of great interest.

823 Another informative next step would be to use DeepUrfold to identify struc-  
824 tural fragments that contain similar patterns of geometry and biophysical properties  
825 between proteins from quite different superfamilies. Notably, these fragments may be  
826 continuous or discontinuous, and pursuing this goal might help unify the ‘primordial  
827  
828

peptides' [2] and 'themes' [27] concepts with the Urfold hypothesis, allowing connections between unexplored (or at least under-explored) regions of fold space. Also, we suspect that 'Explainable AI' techniques, such as layer-wise relevance propagation (LRP; [55, 56]), can be used to elucidate which atoms/residues, along with their 3D locations and biophysical properties, are deemed most important in defining the various classification groups that are identified by DeepUrfold (i.e., the structural and physicochemical determinants of why a given protein falls into urfold  $\mathcal{A}$  versus urfold  $\mathcal{B}$ ). This goal can be pursued within the DeepUrfold framework because we discretize full domain structures into voxels as part of the 3D-CNN data encoding scheme (Supp Info §2): thus, we can probe the neural network (i.e., trained model) to learn about specific voxels, or groups of specific voxels (e.g., amino acid residues), that contribute as sub-domain structural elements. Doing so would, in turn, be useful in finding common sub-domain segments from different superfamilies. We hypothesize that the most 'relevant' (in the sense of LRP) voxels would highlight important sub-structures; most promisingly, that we know the position, biochemical and biophysical properties, and so on about the residues would greatly illuminate the *physical* basis for the deep learning-based classification. In addition, this would enable us to explore in more detail the mechanistic/structural basis for the mixed-membership features of the SBM-based protein communities. Beyond helping to detect and define new urfolds, for use in areas like protein engineering or drug design, such communities of weakly-related proteins may offer a powerful new lens on remote protein homology.

## Online Methods

The following subsections describe the computational methodology that underlies the DeepUrfold framework.

### Datasets

Using 'Prop3D', a computational toolkit that we have developed for handling protein properties in machine learning and structural bioinformatics pipelines [44], we created a 'Prop3D-20sf' dataset. This dataset employs 20 highly-populated, diverse CATH superfamilies of interest (Fig 1C); these superfamilies are enumerated in Supp Table S1, which includes annotated rationales for many of the SFs (in the table and its accompanying text). Domain structures from each of the 20 SFs are 'cleaned' by adding missing residues with MODELLER [57], missing atoms with SCWRL4 [58], and protonating and energy minimizing (simple debump) with PDB2PQR [59]. Next, we compute a host of derived properties for each domain in CATH [44], including (i) purely geometric/structural quantities, e.g. secondary structure labels [60] and solvent accessibility, (ii) physicochemical properties, e.g. hydrophobicity, partial charges, electrostatic potentials, (iii) basic chemical descriptors (atom and residue types), and (iv) phylogenetic conservation. As detailed in [44], these computations rely heavily on the Toil workflow engine [61], and data were stored using the Hierarchical Data Format (version 5) in the Highly Scalable Data Service (HSDS). The domains from each SF were split such that all members of an S35 35% sequence identity cluster (pre-calculated by CATH) were on the same side of the split; as

875 described in [44], we constructed data splits so as to mitigate evolutionary ‘data leak-  
876 age’. We partition the protein data roughly as 80% training, 10% validation, and  
877 10% test (<https://doi.org/10.5281/zenodo.6873024>; further technical details regarding  
878 enactment of the computational workflows can be found in [44]).

879 In our Prop3D dataset, each atom is attributed with the following seven groups  
880 of features, which are one-hot (Boolean) encoded: (i) Atom Type (C, CA, N, O, OH,  
881 Unknown); (ii) Residue Type (ALA, CYS, ASP, GLU, PHE, GLY, HIS, ILE, LYS, LEU,  
882 MET, ASN, PRO, GLN, ARG, SER, THR, VAL, TRP, TYR, Unknown); (iii) Secondary  
883 Structure (Helix, Sheet, Loop/Unknown); (iv) Hydrophobic (or not); (v) Electronega-  
884 tive (or not); (vi) Positively-charged (or not); and (vii) Solvent-exposed (or not). For  
885 all of the DeepUrfold final production models reported here, the “residue type” fea-  
886 ture was omitted because it was found to be uninformative, at least for this type of  
887 representation (see Supp Info §3 and Supp Figs S3-4); interestingly, this finding about  
888 the dispensability of a residue-type feature was presaged in early work on this project  
889 (e.g., the receiver operating characteristic (ROC) curves in Fig 2 of ref [62]).

890

## 891 Protein 3D Structure Representation

892

893 We represent protein domains in DeepUrfold’s 3D-CNN by discretization into 3D  
894 volumetric pixels, or voxels, as described in Supp Info §2. Briefly, our method centers  
895 a protein domain in a  $256^3 \text{ \AA}^3$  cubic volume to allow for large domains, and each atom  
896 is mapped to a  $1 \text{ \AA}^3$  voxel using a  $k$ D-tree data structure, with a query ball radius set  
897 to the van der Waals radius of the atom from a lookup table. If two atoms occupy the  
898 same given voxel—a possibility, as the solid diagonal of such a cube is  $\sqrt{3} \approx 1.732 \text{ \AA}$ —  
899 then the maximum (element-wise) between their feature vectors is used for that voxel  
900 (justifiable because they are all binary-valued). Because a significant fraction of voxels  
901 in our representation domain do not contain any atoms, protein domain structures can  
902 be encoded in this way via a sparse representation; doing so, via an implementation  
903 using MinkowskiEngine [63], substantially reduces the computational costs of our deep  
904 learning workflow.

905 Because there is no unique or ‘correct’ canonical orientation of a protein structure  
906 in  $\mathbb{R}^3$ , we applied random rotations to each protein domain structure as part of the  
907 model training routine; these rotations were in the form of orthogonal transformation  
908 matrices randomly drawn from the Haar distribution, which is the uniform distribution  
909 on the 3D rotation group, i.e.,  $SO(3)$  [64].

910

## 911 Stacked 3D-CNN/VAE Model Design and Training

912

913 A sparse 3D-CNN variational autoencoder was adapted from MinkowskiEngine [63,  
914 65]. In DeepUrfold’s Encoder, there are seven blocks consisting of Convolution ( $n$ -  
915  $\rightarrow 2n$ ), BatchNorm, Exponential Linear Unit (ELU) activation functions, Convolution  
916 ( $2n \rightarrow 2n$ ), BatchNorm, and ELU, where  $n=[16, 32, 64, 128, 256, 512, 1024]$ , or a  
917 doubling at each block. Finally, the tensors are pooled using a Global Pooling routine,  
918 and the model outputs both a normal distribution’s mean and log variance. Next, the

919

920

921

learned distribution is sampled from<sup>6</sup> and used as input to the Decoder. The decoder also consists of seven blocks, where each block consists of ConvolutionTranspose(2n>n), BatchNorm, ELU, Convolution(n>n), BatchNorm, and ELU. Finally, one more convolution is used to output a reconstructed domain structure in a 256<sup>3</sup> Å<sup>3</sup> volume. A detailed layout of DeepUrfold’s model architecture can be found in Supp Info §8.

In VAE training calculations, a well-established ‘reparameterization trick’ enable gradients to be computed for backpropagation steps despite the VAE’s latent space variables being sampled stochastically. This is achieved by making only the mean ( $\mu$ ) and variance ( $\sigma$ ) differentiable, with a random variable that is normally distributed ( $\mathcal{N}(0, \mathbf{I})$ ). That is, the latent variable posterior  $\mathbf{z}$  is given by  $\mathbf{z} = \mu + \sigma \odot \mathcal{N}(0, \mathbf{I})$ , where  $\odot$  denotes the Hadamard (element-wise) matrix product and  $\mathcal{N}$  is an ‘auxiliary noise’ term [66].

We optimize against the negative Evidence Lower BOund (–(ELBO)) described in Equation 1, which combines into a single quantity (i) the mean squared error (MSE) of the reconstructed domain and (ii) the difference between the learned distribution and the true distribution of the SF (i.e., the KL divergence, or relative entropy between the true/underlying distribution of the data given a model,  $p$ , and our learned/inferred posterior distribution of latent parameters given the data,  $q$  [66]).

We used stochastic gradient descent (SGD) as the optimization algorithm for parameter updates during NN model training, with a momentum of 0.9 and 0.0001 weight decay. We began with a learning rate of 0.2 and decreased its value by 0.9 every epoch using an exponential learning rate scheduler. Our final network has  $\approx 110\text{M}$  parameters in total and all the networks were trained for 30 epochs, using a batch size of 255 (Supp Fig S2 provides an illustrative example of model training with Igs). We utilized the open-source frameworks PyTorch [67] and PytorchLightning [68] to simplify training and inference, and to make the models more reproducible.

To optimize/tune hyperparameters for DeepUrfold’s VAE, we used Weights & Biases Sweeps [69] to parameter-scan across the batch size, learning rate, convolution kernel size, transpose convolution kernel size, and convolution stride in the Ig model, while minimizing the –(ELBO). We used a Bayesian Optimization search strategy and ‘hyperband’ method with three iterations for early termination. We found no significant changes to parameters, and therefore used the following default values: convolution kernel size of 3, transpose convolution kernel size of 2, and convolution stride of 2.

Due to a large-scale class imbalance between the number of domains in each superfamily (e.g., over-representation of Igs), we follow the “one-class classifier” approach, creating one VAE for each superfamily. As part of our ‘control experiments’, we also

---

<sup>6</sup>A VAE’s modeling/learning of this latent space distribution is what makes it a form of *generative* modeling: were one so inclined, the learnt distribution could be used to generate new instances/samples of the type of entity being modeled (a string of text, image data, etc.), in as optimal a manner as possible (‘optimal’ in terms of the match between statistical distributions of the generated entities relative to the observed data); more concretely, new entities could be created, for example, by interpolating between latent space embeddings. The generative approach contrasts with, e.g., more traditional *discriminative* models, wherein the likelihood of specific labels being associated with specific instances can be assessed and used to classify/discriminate between the different types of instances (versus spawning new ones). A benefit of generative models is that they develop a probabilistic framework that describes the statistics of the observed instance $\leftrightarrow$ label mappings, thus enabling new entities to be created. Such approaches are powerful, e.g., in de novo protein design.

967 train a joint SH3 and OB model and compare random over- and under-sampling from  
968 ImbalancedLearn [42] on joint models of multiple superfamilies (Supp Info §4.2, Supp  
969 Fig S8).

970 All 20 SF models used throughout this work (i.e., in Prop3D-20sf) were trained  
971 using between one and four NVIDIA RTX A6000 GPUs on a Lambda Labs Deep  
972 Learning workstation.

973

## 974 **Evaluation of Model Performance**

975

976 We calculated the area under the ROC curve (auROC) and the area under the  
977 precision-recall curve (auPRC) for the 20 SFs. Representative domains, as defined  
978 by CATH, for each superfamily were subjected to their SF-specific VAE models and  
979 predicted values were micro-averaged to perform auROC and auPRC calculations.  
980 Immunoglobulins were chosen for purposes of display in this work (Supp Info §3, Supp  
981 Figs S2-6), and the results for all SFs can be found in the extended Supp Info. All SFs  
982 resulted in roughly similar metrics for each of the seven different groups of encoded  
983 features (Supp Figs S3-4).

984

## 985 **Assessment of the UrFold Model’s Topological Sensitivity by** 986 **Systematically Scrambling Loops**

987

988 To gauge the sensitivity of our DeepUrFold model to loop orderings (i.e., topology),  
989 we subjected artificial protein structures, with systematically permuted secondary  
990 structural elements, to superfamily-specific VAEs. To do this, we generated a series  
991 of fictitious folds by implementing a multi-loop permutation algorithm [43], allowing  
992 us to systematically ‘re-wire’ the SSEs found in representative SH3 and OB domains  
993 in order to exhaustively sample all possible topological orderings (numbering 96, in  
994 the case of the SBB’s 4-stranded  $\beta$ -sheet). We stitched together the SSEs in various  
995 orders and relaxed the conformations/energetics of each new 3D structure using the  
996 MODELLER suite [57].

997 Next, each novel permuted structure is subjected to a VAE model trained on all  
998 other domains from the SH3 homologous superfamily. Fit to the model is approximated  
999 by the log-likelihood score of the permuted and natural (wild-type) protein represented  
1000 –(ELBO) scores, which can be viewed as a similarity metric (goodness-of-fit of a  
1001 given structure to the VAE model). We also calculated a ‘background’ distribution  
1002 of each model by performing an all-vs-all TM-align calculation for all domains in our  
1003 representative CATH domain set; in this step, we recorded any domains that have a  
1004 TM-score  $\leq 0.3$ , as that threshold quantity is thought to correspond to domains that  
1005 have random 3D structural similarity (see also the description in Supp Info §4).

1006

## 1007 **Exploration of Latent-space Organization**

1008 We subjected all representative domains (numbering 3,674) from each individual SF  
1009 to an inference pass through each of the 20 SF-specific DeepUrFold models, and visual-  
1010 ized the 20 different latent space embeddings for all representatives from each separate  
1011 model. These results are further detailed in Supp Info §5: in particular, Supp Info §5.4  
1012

describes the individual, SF-level feature embeddings that we analyzed as 20 independent subspace projections (Supp Fig S12 shows each of these). More concretely, a ‘latent space’ for a given domain from one SF-specific VAE corresponds to a 1,024-dimensional vector describing the representative domain in its most ‘compressed’ or ‘distilled’ form in the feature space learned by the VAE model, accounting for the position of each atom, their biophysical properties (represented by the mean of the learned distribution), and any other features that were included in the model (e.g., phylogenetic properties; see above). We then pooled the latent spaces for every domain from each superfamily-specific VAE into a single dataset by concatenating on the feature or column dimension, e.g. the shape of the dataset from a single superfamily model is (3674, 1024) and the combined dataset becomes (3674, 20480) after concatenation.

The DeepUrfold-learned embeddings from two different, independently-trained SF-specific VAE models may not be directly comparable, as they can in general occupy different regions of the learned latent (hyper)space. This, in turn, makes it problematic to simply concatenate such embeddings in the feature dimension. An alternative approach could be to ‘shift’ the embedding vectors to a common region of latent space, via a method known as Optimal Transport (OT) for domain adaptation. As shown in Supp Fig S13 and detailed in its accompanying caption, we applied the OT algorithm (using Sinkhorn-based transport with group LASSO L1L2 regularization) and then concatenated on the feature dimension; reassuringly, this process achieved similar results as our more naive concatenation approach, inasmuch as SFs exhibited a clear dispersal in terms of SSE content (i.e., the non-OT-based approach [Fig 3] and OT-based approach [Supp Fig S13] are roughly similar).

Finally, we reduced the number of latent space dimensions to two (giving a (3674, 2)-sized matrix across all domains) in order to aid visualization of the learned embeddings. We achieved this via three dimensionality-reduction approaches, including the uniform manifold approximation and projection (UMAP) method. As a subspace projection method, the UMAP algorithm is more powerful than the principal component analysis (PCA) method, the latter of which assumes linearity in the data (we also applied PCA to the DeepUrfold embeddings [Supp Fig S11]). Also, UMAP more robustly captures long-range structure/correlations in a dataset than does the common t-distributed stochastic neighbor embedding (t-SNE) approach, which we also applied to the DeepUrfold embeddings (Supp Fig S10). Given our naivety about DeepUrfold’s latent spaces, we utilized UMAP as a de facto projection approach because it provides both (i) a well-formed metric notion of local distances (e.g., within-clusters) and (ii) better preservance (versus t-SNE) of the topological structure/relationships amongst more distant points in a dataset, e.g., more global-scale, between-cluster orderings.

## Mixed-membership Community Detection via SBMs

We performed all-vs-all comparisons of domains and superfamilies by subjecting representative protein domain structures from each of the 20 chosen SFs through each SF-specific one-class VAE model. The  $-(\text{ELBO})$  loss score for each  $(i, j)$  pair (domain $_i^{\text{rep}}$ , SF $_j^{\text{model}}$ ) can be used to quantitatively evaluate pairwise ‘distances’ between SFs by treating the complete set of distances as a fully connected bipartite graph between domains  $i$  (one side of the graph) and SF models  $j$  (other side of the

1059 graph), defined by adjacency matrix  $\mathbf{A}_{ij}$ , with edges weighted by the  $-\log(-(\text{ELBO}))$   
1060 scores from the covariate matrix,  $\mathbf{x}$ . Stochastic Block Models (SBM; [48]) offer a gen-  
1061 erative, nonparametric Bayesian inference-based approach for community detection in  
1062 random graphs [49]. Therefore, we used SBM algorithms to partition the DeepUrfold-  
1063 derived bipartite graph into communities of domains that have similar distributions  
1064 of edge covariates between them. Using the SBM likelihood equation (Equation 2),  
1065 inference is done via the posterior:

$$1066 \quad P(\mathbf{b}, \mathbf{G} | \mathbf{A}, \mathbf{x}) = \frac{P(\mathbf{A}, \mathbf{x}, \gamma, \mathbf{G}, \mathbf{k}, \mathbf{e}, \mathbf{b})}{P(\mathbf{A}, \mathbf{x})} \quad (3)$$

1068 where  $\mathbf{b}$  is the overlapping partition,  $\mathbf{e}$  is the matrix of edge counts between groups,  
1069  $\mathbf{k}$  is the labelled degree sequence, and  $\mathbf{G}$  is a tensor representing half-edges (each  
1070 edge end-point  $r, s$ ) to account for mixed-membership, satisfying  $A_{ij} = \sum_{rs} G_{ij}^{rs}$ .  
1071 Edge covariates  $\mathbf{x}$  are sampled from a microcanonical distribution,  $P(\mathbf{x} | \mathbf{G}, \gamma)$ , where  
1072  $\gamma$  adds a hard constraint such that  $\sum_{ij} G_{ij}^{rs} x_{ij} = \gamma_{rs}$  (personal communication with  
1073 T. Peixoto and Sec. VIIC in [47]).

1074 Using the same SBM approach as we did for post-processing the DeepUrfold-  
1075 derived data (i.e., ELBO-quantified fits between domain representatives and SF-  
1076 specific VAE models), we also compared our results to community analyses of data  
1077 that we performed by using state-of-the-art sequence- and structure-based meth-  
1078 ods for comparing proteins (e.g., HMMER, ESM, SeqDesign, etc. listed in Fig 5 and  
1079 Supp Table S3). All SBMs were created using fully-connected  $n \times m$  bipartite graphs,  
1080 linking  $n$  CATH S35 domains to  $m$  SF models. In our current work, we used 3,674  
1081 representative CATH domains from 20 superfamilies, yielding a  $3,674 \times 20$ -element  
1082 similarity matrix for each of the various methods (UCLUST, HMMER, SeqDesign, etc.)  
1083 that we sought to compare. Each SBM was degree-corrected, overlapping, and nested  
1084 and fit to a real normal distribution of edge covariates. For those methods that give  
1085 decreasing scores with increasing similarity (i.e., closer to zero is greater similarity),  
1086 we  $-\log$ -transformed each score, whereas values from methods with a non-inverse  
1087 relationship between the score metric and inferred similarity (i.e., higher values mean  
1088 greater similarity) were unaltered.

1089 While only ‘superfamily-specific’ methodologies/models would be directly compa-  
1090 rable to the task performed by DeepUrfold (e.g., where  $n \times m$  matrices are the original  
1091 output created by subjecting  $n$  CATH representative domains without labels to  $m$   
1092 SF-specific models), for purposes of comparison we also included ‘pairwise’ and ‘single  
1093 model’ methods (Fig. 5). This was accomplished in the following way: For pairwise  
1094 approaches, an all-vs-all  $n \times n$  similarity matrix was created and then converted to  
1095  $n \times m$  by taking the median distance of a single CATH domain to every other domain  
1096 in a given SF. What we are calling ‘single model’ approaches here are those wherein  
1097 a single model is trained on all known proteins and outputs a single embedding score  
1098 for each domain, creating an  $n \times 1$  vector. To convert that data form into an  $n \times m$   
1099 matrix, we took the median distance of a single CATH domain embedding to every  
1100 other domain embedding from a given SF.

1101  
1102  
1103  
1104



## Evaluating SBM Communities, and Comparing to CATH 1105

Because we have no ground truth for the new Urfold view of protein structure similarities (and the resultant protein universe), we applied cluster comparison metrics to evaluate each SBM community both in a self-contained manner and as referred against the original CATH clusterings. The specific measures we considered include the following *silhouette score*, *partition overlap*, *homogeneity*, and *completeness*, for each of the various protein comparison approaches listed in Fig. 5: 1106  
1107  
1108  
1109  
1110  
1111

- **Silhouette Score:** Provides a measure of how similar an object is to its own cluster (*cohesion*) compared to next-closest cluster (*separation*), with values ranging from  $-1$  (poor grouping) to  $1$  (ideal). 1112  
1113  
1114  
1115
- **Overlap:** Describes the maximum overlap between partitions, by solving an instance of the maximum weighted bipartite matching problem [51]. 1116  
1117
- **Homogeneity:** The optimal value ( $1$ ) occurs when each cluster contains only members of a single class; this metric ranges from  $[0, 1]$ . 1118  
1119
- **Completeness:** Ranging from  $[0, 1]$ , the optimal value ( $1$ ) occurs when all members of a given class are (presumably correctly) assigned to the same cluster. 1120  
1121

All of our comparisons start by using the sequence and structure representatives from CATH's S35 cluster for each of the 20 superfamilies of interest. The code USE-ARCH [70] was run twice with parameters `-allpairs_local` and `-allpairs_global`; both runs included the `-acceptall` parameter. HMMER [71] models were built using (1) MUSCLE [72] alignments from CATH's S35 cluster; and (2) a deep MSA created from EVcouplings [73] using jackhmmer [71] and UniRef90 of the first S35 representative for each superfamily. Each HMMER model was used to search all representatives, reporting all sequences with bitscores  $\geq -10^{12}$ . SeqDesign [74] was run using the same MSAs from EVcouplings. Finally, we also compared our DeepUrfold results against the ESM pre-trained protein language model [75]. 1122  
1123  
1124  
1125  
1126  
1127  
1128  
1129  
1130  
1131

For other structure-based comparisons, we ran TM-Align [76] on all representative domains, with and without allowing for circular permutations, and saving the RMSD and TM-score values. Struct2Seq [77] was executed with default parameters after converting domain structure representatives into dictionaries in order to match the required form of input. 1132  
1133  
1134  
1135  
1136

Finally, as a baseline, we also compare random groupings to CATH. First, we create a uniform random grouping with 20 groups using numpy's `random.choice` function. Next, we tried using the same SBM clustering above using random weights with numpy's `random.rand` function. The random SBM converged into a solution with only two groups: one for all domains and another for all VAE models (Supp Fig S23). 1137  
1138  
1139  
1140  
1141  
1142

## Acknowledgements 1143

We thank Luis Felipe Murillo and John Readey for support with HSDS, as well as Jaime Iranzo and Tiago Peixoto for discussions regarding SBMs; we also thank Menuka Jaiswal, Saad Saleem, and Yonghyeon Kweon for early efforts on this project. Portions of this work were supported by the University of Virginia and NSF CAREER award 1144  
1145  
1146  
1147  
1148  
1149

1150

1151 MCB-1350957. EJD was supported by a University of Virginia Presidential Fellowship  
1152 in Data Science.

1153 **Supplementary information.** Supplemental information attached as PDF  
1154

## 1155 **Declarations**

1156

1157 • **Funding.** Portions of this work were supported by the University of Virginia and  
1158 NSF CAREER award MCB-1350957. EJD was supported by a University of Virginia  
1159 Presidential Fellowship in Data Science.

1160 • **Conflict of interest/Competing interests** None declared.

1161 • **Ethics approval.** Not Applicable.

1162 • **Consent to participate.** Not Applicable.

1163 • **Consent for publication.** All author’s consent to publication.

1164 • **Availability of data and materials.** The Prop3D framework to create, share  
1165 and load datasets *and* its associated Prop3D-20sf pre-built dataset are available at  
1166 <https://prop3d.readthedocs.io/>. Prop3D contains instructions for connecting to the  
1167 public Prop3D-20sf HSDS endpoint (<http://prop3d-hsds.pods.uvarc.io/about>) and  
1168 parsing the Prop3D-20sf raw hdf5 file (<https://doi.org/10.5281/zenodo.6873024>).  
1169 The extended supplemental material, including the 20 pre-trained SF models and  
1170 raw output from the stochastic block modelling of DeepUrfold and other tools used  
1171 to compare against can be found at <https://doi.org/10.5281/zenodo.6916524>. We  
1172 also provide an accompanying website to explore the SBM communities and the  
1173 CATH hierarchy at <https://bournelab.org/research/DeepUrfold/>.

1174 • **Code availability.** All code to build datasets and train models can be found at <http://github.com/bouralab/Prop3D>  
1175 and <http://github.com/bouralab/DeepUrfold>,  
1176 respectively.

1177 • **Author contributions.** EJD designed and implemented DeepUrfold. CM and SV  
1178 developed the initial Urfold model. EJD and CM led the manuscript preparation,  
1179 and CM and PEB advised the project.

## 1181 **References**

1182

1183 [1] Kolodny, R., Pereyaslavets, L., Samson, A. O. & Levitt, M. On the universe of  
1184 protein folds. *Annual Review of Biophysics* **42**, 559–582 (2013).

1186 [2] Alva, V., Söding, J. & Lupas, A. N. A vocabulary of ancient peptides at the  
1187 origin of folded proteins. *eLife* **4**, e09410 (2015). URL <http://dx.doi.org/10.7554/eLife.09410>.

1190 [3] Kolodny, R., Nepomnyachiy, S., Tawfik, D. S. & Ben-Tal, N. Bridging themes:  
1191 short protein segments found in different architectures. *Molecular Biology and*  
1192 *Evolution* **38**, 2191–2208 (2021). URL <http://dx.doi.org/10.1093/molbev/msab017>.

1194  
1195  
1196

- [4] Bromberg, Y. *et al.* Quantifying structural relationships of metal-binding sites suggests origins of biological electron transfer. *Sci. Adv.* **8** (2022). URL <https://www.science.org/doi/10.1126/sciadv.abj3984>.  
1197  
1198  
1199  
1200
- [5] Alvarez-Carreño, C., Gupta, R. J., Petrov, A. S. & Williams, L. D. Creative destruction: New protein folds from old. *Proc. Natl. Acad. Sci. U. S. A.* **119**, e2207897119 (2022).  
1201  
1202  
1203  
1204
- [6] Youkharibache, P. Protodomains: Symmetry-related supersecondary structures in proteins and self-complementarity. *Methods in Molecular Biology* **1958**, 187–219 (2019). URL [http://dx.doi.org/10.1007/978-1-4939-9161-7\\_10](http://dx.doi.org/10.1007/978-1-4939-9161-7_10).  
1205  
1206  
1207  
1208
- [7] Elofsson, A. Progress at protein structure prediction, as seen in casp15. *Current Opinion in Structural Biology* **80**, 102594 (2023). URL <https://www.sciencedirect.com/science/article/pii/S0959440X23000684>.  
1209  
1210  
1211  
1212
- [8] Wodak, S. J., Vajda, S., Lensink, M. F., Kozakov, D. & Bates, P. A. Critical assessment of methods for predicting the 3d structure of proteins and protein complexes. *Annual Review of Biophysics* **52**, 183–206 (2023). URL <https://doi.org/10.1146/annurev-biophys-102622-084607>. PMID: 36626764.  
1213  
1214  
1215  
1216
- [9] Youkharibache, P. *et al.* The small  $\beta$ -barrel domain: A survey-based structural analysis. *Structure* **27**, 6–26 (2019). URL <http://dx.doi.org/10.1016/j.str.2018.09.012>.  
1217  
1218  
1219  
1220
- [10] Mura, C., Randolph, P. S., Patterson, J. & Cozen, A. E. Archaeal and eukaryotic homologs of Hfq: A structural and evolutionary perspective on Sm function. *RNA Biology* **10**, 636–651 (2013). URL <https://doi.org/10.4161/rna.24538>.  
1221  
1222  
1223  
1224
- [11] Lee, C. & Wilkinson, D. J. A review of stochastic block models and extensions for graph clustering. *Applied Network Science* **4**, 1–50 (2019).  
1225  
1226  
1227
- [12] Mura, C., Veretnik, S. & Bourne, P. E. The *Urfold*: Structural similarity just above the superfold level? *Protein Science* **28**, 2119–2126 (2019). URL <http://dx.doi.org/10.1002/pro.3742>.  
1228  
1229  
1230  
1231
- [13] Grishin, N. V. Fold change in evolution of protein structures. *Journal of Structural Biology* **134**, 167–185 (2001). URL <http://dx.doi.org/10.1006/jsbi.2001.4335>.  
1232  
1233  
1234
- [14] Kinch, L. N. & Grishin, N. V. Evolution of protein structures and functions. *Current Opinion in Structural Biology* **12**, 400–408 (2002). URL [http://dx.doi.org/10.1016/s0959-440x\(02\)00338-x](http://dx.doi.org/10.1016/s0959-440x(02)00338-x).  
1235  
1236  
1237  
1238
- [15] Krishna, S. S. & Grishin, N. V. Structural drift: a possible path to protein fold change. *Bioinformatics* **21**, 1308–1310 (2005). URL <http://dx.doi.org/10.1093/bioinformatics/bti227>.  
1239  
1240  
1241  
1242

- 1243 [16] Alvarez-Carreño, C., Penev, P. I., Petrov, A. S. & Williams, L. D. Fold evolution  
1244 before LUCA: Common ancestry of SH3 domains and OB domains. *Molecular*  
1245 *Biology and Evolution* **38**, 5134–5143 (2021). URL [http://dx.doi.org/10.1093/m](http://dx.doi.org/10.1093/molbev/msab240)  
1246 [olbev/msab240](http://dx.doi.org/10.1093/molbev/msab240).  
1247
- 1248 [17] Sadreyev, R. I., Kim, B.-H. & Grishin, N. V. Discrete-continuous duality of pro-  
1249 tein structure space. *Current Opinion in Structural Biology* **19**, 321–328 (2009).  
1250 URL <http://dx.doi.org/10.1016/j.sbi.2009.04.009>.  
1251
- 1252 [18] Taylor, W. R. Exploring protein fold space. *Biomolecules* **10** (2020). URL  
1253 <http://dx.doi.org/10.3390/biom10020193>.  
1254
- 1255 [19] Holm, L. & Sander, C. Mapping the protein universe. *Science* **273**, 595–603  
1256 (1996). URL <http://dx.doi.org/10.1126/science.273.5275.595>.  
1257
- 1258 [20] Hou, J., Jun, S.-R., Zhang, C. & Kim, S.-H. Global mapping of the protein  
1259 structure space and application in structure-based inference of protein function.  
1260 *Proceedings of the National Academy of Sciences of the United States of America*  
1261 **102**, 3651–3656 (2005). URL <http://dx.doi.org/10.1073/pnas.0409772102>.  
1262
- 1263 [21] Edwards, H. & Deane, C. M. Structural bridges through fold space. *PLoS Com-*  
1264 *putational Biology* **11**, e1004466 (2015). URL [http://dx.doi.org/10.1371/journal](http://dx.doi.org/10.1371/journal.pcbi.1004466)  
1265 [.pcbi.1004466](http://dx.doi.org/10.1371/journal.pcbi.1004466).  
1266
- 1267 [22] Skolnick, J., Arakaki, A. K., Lee, S. Y. & Brylinski, M. The continuity of protein  
1268 structure space is an intrinsic property of proteins. *Proceedings of the National*  
1269 *Academy of Sciences of the United States of America* **106**, 15690–15695 (2009).  
1270 URL <http://dx.doi.org/10.1073/pnas.0907683106>.  
1271
- 1272 [23] Friedberg, I. & Godzik, A. Fragnostic: walking through protein structure space.  
1273 *Nucleic Acids Research* **33**, W249–51 (2005). URL [http://dx.doi.org/10.1093/n](http://dx.doi.org/10.1093/nar/gki363)  
1274 [ar/gki363](http://dx.doi.org/10.1093/nar/gki363).  
1275
- 1276 [24] Harrison, A., Pearl, F., Mott, R., Thornton, J. & Orengo, C. Quantifying the  
1277 similarities within fold space. *Journal of Molecular Biology* **323**, 909–926 (2002).  
1278 URL [http://dx.doi.org/10.1016/S0022-2836\(02\)00992-0](http://dx.doi.org/10.1016/S0022-2836(02)00992-0).  
1279
- 1280 [25] Harrison, A. *et al.* Recognizing the fold of a protein structure. *Bioinformatics*  
1281 **19**, 1748–1759 (2003). URL <http://dx.doi.org/10.1093/bioinformatics/btg240>.  
1282
- 1283 [26] Goncarenco, A., Shaytan, A. K., Shoemaker, B. A. & Panchenko, A. R. Struc-  
1284 tural perspectives on the evolutionary expansion of unique protein-protein binding  
1285 sites. *Biophysical Journal* **109**, 1295–1306 (2015). URL [http://dx.doi.org/10.10](http://dx.doi.org/10.1016/j.bpj.2015.06.056)  
1286 [16/j.bpj.2015.06.056](http://dx.doi.org/10.1016/j.bpj.2015.06.056).  
1287
- 1288 [27] Nepomnyachiy, S., Ben-Tal, N. & Kolodny, R. Complex evolutionary footprints  
1289 revealed in an analysis of reused protein segments of diverse lengths. *Proceedings*

- of the National Academy of Sciences of the United States of America* **114**, 11703–11708 (2017). URL <http://dx.doi.org/10.1073/pnas.1707642114>. 1289  
1290
- [28] Steinegger, M. *et al.* HH-suite3 for fast remote homology detection and deep protein annotation. *BMC Bioinformatics* **20**, 473 (2019). URL <http://dx.doi.org/10.1186/s12859-019-3019-7>. 1291  
1292  
1293  
1294
- [29] Budowski-Tal, I., Nov, Y. & Kolodny, R. FragBag, an accurate representation of protein structure, retrieves structural neighbors from the entire PDB quickly and accurately. *Proceedings of the National Academy of Sciences of the United States of America* **107**, 3481–3486 (2010). URL <http://dx.doi.org/10.1073/pnas.0914097107>. 1295  
1296  
1297  
1298  
1299  
1300
- [30] Kolodny, R., Koehl, P., Guibas, L. & Levitt, M. Small libraries of protein fragments model native protein structures accurately. *Journal of Molecular Biology* **323**, 297–307 (2002). URL [http://dx.doi.org/10.1016/s0022-2836\(02\)00942-7](http://dx.doi.org/10.1016/s0022-2836(02)00942-7). 1301  
1302  
1303  
1304
- [31] Durairaj, J., Akdel, M., de Ridder, D. & van Dijk, A. D. J. Geometricus represents protein structures as shape-mers derived from moment invariants. *Bioinformatics* **36**, i718–i725 (2020). URL <http://dx.doi.org/10.1093/bioinformatics/btaa839>. 1305  
1306  
1307  
1308
- [32] Sillitoe, I. *et al.* CATH: expanding the horizons of structure-based functional annotations for genome sequences. *Nucleic Acids Research* **47**, D280–D284 (2019). URL <http://dx.doi.org/10.1093/nar/gky1097>. 1309  
1310  
1311  
1312
- [33] Andreeva, A., Howorth, D., Chothia, C., Kulesha, E. & Murzin, A. G. SCOP2 prototype: a new approach to protein structure mining. *Nucleic Acids Research* **42**, D310–4 (2014). URL <http://dx.doi.org/10.1093/nar/gkt1242>. 1313  
1314  
1315  
1316
- [34] Fox, N. K., Brenner, S. E. & Chandonia, J.-M. SCOPe: Structural classification of proteins—extended, integrating SCOP and ASTRAL data and classification of new structures. *Nucleic Acids Research* **42**, D304–9 (2014). URL <http://dx.doi.org/10.1093/nar/gkt1240>. 1317  
1318  
1319  
1320
- [35] Cheng, H. *et al.* ECOD: an evolutionary classification of protein domains. *PLoS Computational Biology* **10**, e1003926 (2014). URL <http://dx.doi.org/10.1371/journal.pcbi.1003926>. 1321  
1322  
1323  
1324
- [36] Agrawal, V. & Kishan, R. K. Functional evolution of two subtly different (similar) folds. *BMC Structural Biology* **1**, 1–6 (2001). 1325  
1326  
1327
- [37] Theobald, D. L. & Wuttke, D. S. Divergent evolution within protein superfolds inferred from profile-based phylogenetics. *Journal of Molecular Biology* **354**, 722–737 (2005). URL <http://dx.doi.org/10.1016/j.jmb.2005.08.071>. 1328  
1329  
1330  
1331
- [38] LeCun, Y., Bengio, Y. & Hinton, G. Deep Learning. *Nature* **521**, 436–444 (2015). 1332  
1333  
1334

- 1335 [39] Kingma, D. P. & Ba, J. Adam: A method for stochastic optimization (2014).  
1336 URL <https://arxiv.org/abs/1412.6980>.  
1337
- 1338 [40] Murphy, K. P. *Machine Learning: A Probabilistic Perspective (Adaptive Com-*  
1339 *putation and Machine Learning series)* Illustrated edition edn (The MIT Press,  
1340 2012).  
1341
- 1342 [41] Prati, R. C., Batista, G. E. A. P. A. & Monard, M. C. Data mining with  
1343 imbalanced class distributions: Concepts and methods (2009).  
1344
- 1345 [42] Lemaître, G., Nogueira, F. & Aridas, C. K. Imbalanced-learn: A Python tool-  
1346 box to tackle the curse of imbalanced datasets in machine learning. *Journal of*  
1347 *Machine Learning Research* **18**, 1–5 (2017). URL [http://jmlr.org/papers/v18/](http://jmlr.org/papers/v18/16-365.html)  
1348 [16-365.html](http://jmlr.org/papers/v18/16-365.html).  
1349
- 1350 [43] Dai, L. & Zhou, Y. Characterizing the existing and potential structural space of  
1351 proteins by large-scale multiple loop permutations. *Journal of Molecular Biology*  
1352 **408**, 585–595 (2011). URL <http://dx.doi.org/10.1016/j.jmb.2011.02.056>.  
1353
- 1354 [44] Draizen, E. J., Murillo, L. F. R., Readey, J., Mura, C. & Bourne, P. E. Prop3D:  
1355 A flexible, Python-based platform for machine learning with protein structural  
1356 properties and biophysical data. *bioRxiv* (2022). URL [https://www.biorxiv.org/](https://www.biorxiv.org/content/early/2022/12/30/2022.12.27.522071)  
1357 [content/early/2022/12/30/2022.12.27.522071](https://www.biorxiv.org/content/early/2022/12/30/2022.12.27.522071).  
1358
- 1359 [45] Xu, J. & Zhang, Y. How significant is a protein structure similarity with TM-score  
1360 = 0.5? *Bioinformatics* **26**, 889–895 (2010).  
1361
- 1362 [46] Liu, Y. & Eisenberg, D. 3D Domain swapping: As domains continue to swap.  
1363 *Protein science* **11**, 1285–1299 (2002).  
1364
- 1365 [47] Peixoto, T. P. *Bayesian Stochastic Blockmodeling*, Ch. 11, 289–332 (John Wiley  
1366 Sons, Ltd, 2019). URL [https://onlinelibrary.wiley.com/doi/abs/10.1002/978111](https://onlinelibrary.wiley.com/doi/abs/10.1002/9781119483298.ch11)  
1367 [9483298.ch11](https://onlinelibrary.wiley.com/doi/pdf/10.1002/9781119483298.ch11). [https://onlinelibrary.wiley.com/doi/pdf/10.1002/9781119483298.](https://onlinelibrary.wiley.com/doi/pdf/10.1002/9781119483298.ch11)  
1368 [ch11](https://onlinelibrary.wiley.com/doi/pdf/10.1002/9781119483298.ch11).  
1369
- 1370 [48] Peixoto, T. P. Nonparametric Bayesian inference of the microcanonical stochastic  
1371 block model. *Physical Review E* **95** (2017). URL [https://doi.org/10.1103%2Fphysre](https://doi.org/10.1103/PhysRevE.95.012317)  
1372 [ve.95.012317](https://doi.org/10.1103/PhysRevE.95.012317).  
1373
- 1374 [49] Peixoto, T. P. Nonparametric weighted stochastic block models. *Physical review.*  
1375 *E* **97**, 012306 (2018). URL [https://link.aps.org/doi/10.1103/{PhysRevE}.97.0](https://link.aps.org/doi/10.1103/PhysRevE.97.012306)  
1376 [12306](https://link.aps.org/doi/10.1103/PhysRevE.97.012306).  
1377
- 1378 [50] Peixoto, T. P. Model selection and hypothesis testing for large-scale network  
1379 models with overlapping groups. *Physical Review X* **5** (2015). URL [https://doi.](https://doi.org/10.1103/PhysRevX.5.011033)  
1380 [org/10.1103%2Fphysrevx.5.011033](https://doi.org/10.1103/PhysRevX.5.011033).

- [51] Peixoto, T. P. Revealing consensus and dissensus between network partitions. *Physical Review X* **11**, 021003 (2021). URL <https://link.aps.org/doi/10.1103/PhysRevX.11.021003>. 1381  
1382  
1383  
1384
- [52] Peixoto, T. P. Hierarchical block structures and high-resolution model selection in large networks. *Physical Review X* **4** (2014). URL <https://doi.org/10.1103/2Fphysrevx.4.011047>. 1385  
1386  
1387  
1388
- [53] Kolodny, R. Searching protein space for ancient sub-domain segments. *Current Opinion in Structural Biology* **68**, 105–112 (2021). URL <https://www.sciencedirect.com/science/article/pii/S0959440X20302104>. 1389  
1390  
1391  
1392
- [54] Bourne, P. E., Draizen, E. J. & Mura, C. The curse of the protein ribbon diagram. *PLOS Biology* **20**, 1–4 (2022). URL <https://doi.org/10.1371/journal.pbio.3001901>. 1393  
1394  
1395  
1396
- [55] Montavon, G., Binder, A., Lapuschkin, S., Samek, W. & Müller, K.-R. in *Layer-wise relevance propagation: An overview* (eds Samek, W., Montavon, G., Vedaldi, A., Hansen, L. K. & Müller, K.-R.) *Explainable AI: interpreting, explaining and visualizing deep learning*, Vol. 11700 of *Lecture notes in computer science* 193–209 (Springer International Publishing, Cham, 2019). URL [http://link.springer.com/10.1007/978-3-030-28954-6\\_10](http://link.springer.com/10.1007/978-3-030-28954-6_10). 1397  
1398  
1399  
1400  
1401  
1402
- [56] Hochuli, J., Helbling, A., Skaist, T., Ragoza, M. & Koes, D. R. Visualizing convolutional neural network protein-ligand scoring. *Journal of molecular graphics & modelling* **84**, 96–108 (2018). URL <http://dx.doi.org/10.1016/j.jmgm.2018.06.005>. 1403  
1404  
1405  
1406  
1407
- [57] Eswar, N. *et al.* Comparative protein structure modeling using Modeller. *Current Protocols in Bioinformatics* **Chapter 5**, Unit 5.6 (2006). URL <http://dx.doi.org/10.1002/0471250953.bi0506s15>. 1408  
1409  
1410  
1411
- [58] Krivov, G. G., Shapovalov, M. V. & Dunbrack, R. L. Improved prediction of protein side-chain conformations with SCWRL4. *Proteins* **77**, 778–795 (2009). URL <http://dx.doi.org/10.1002/prot.22488>. 1412  
1413  
1414  
1415
- [59] Dolinsky, T. J. *et al.* PDB2PQR: expanding and upgrading automated preparation of biomolecular structures for molecular simulations. *Nucleic Acids Research* **35**, W522–5 (2007). URL <http://dx.doi.org/10.1093/nar/gkm276>. 1416  
1417  
1418  
1419
- [60] Kabsch, W. & Sander, C. Dictionary of protein secondary structure: pattern recognition of hydrogen-bonded and geometrical features. *Biopolymers* **22**, 2577–2637 (1983). URL <http://dx.doi.org/10.1002/bip.360221211>. 1420  
1421  
1422  
1423
- [61] Vivian, J. *et al.* Toil enables reproducible, open source, big biomedical data analyses. *Nature Biotechnology* **35**, 314–316 (2017). URL <http://dx.doi.org/10.1038/nbt.3772>. 1424  
1425  
1426

- 1427 [62] Jaiswal, M. *et al.* *Deep Learning of Protein Structural Classes: Any Evidence for*  
1428 *an ‘Urfold’?*, 1–6 (2020).  
1429
- 1430 [63] Choy, C., Gwak, J. & Savarese, S. *4d spatio-temporal convnets: Minkowski*  
1431 *convolutional neural networks*, 3075–3084 (2019).  
1432
- 1433 [64] Stewart, G. W. The efficient generation of random orthogonal matrices with an  
1434 application to condition estimators. *SIAM Journal on Numerical Analysis* **17**,  
1435 403–409 (1980). URL <https://doi.org/10.1137/0717034>.  
1436
- 1437 [65] Gwak, J., Choy, C. B. & Savarese, S. *Generative sparse detection networks for*  
1438 *3d single-shot object detection* (2020).  
1439
- 1440 [66] Kingma, D. P. & Welling, M. Auto-encoding variational bayes. *arXiv* (2013).  
1441 URL <https://arxiv.org/abs/1312.6114>.  
1442
- 1443 [67] Paszke, A. *et al.* in *Pytorch: An imperative style, high-performance deep learning*  
1444 *library* (eds Wallach, H. *et al.*) *Advances in Neural Information Processing Sys-*  
1445 *tems 32* 8024–8035 (Curran Associates, Inc., 2019). URL <http://papers.neurips>  
1446 [.cc/paper/9015-pytorch-an-imperative-style-high-performance-deep-learning-lib](http://papers.neurips.cc/paper/9015-pytorch-an-imperative-style-high-performance-deep-learning-library.pdf)  
1447 [rary.pdf](http://papers.neurips.cc/paper/9015-pytorch-an-imperative-style-high-performance-deep-learning-library.pdf).  
1448
- 1449 [68] Falcon, W. *et al.* Pytorchlightning/pytorch-lightning: 0.7.6 release (2020). URL  
1450 <https://doi.org/10.5281/zenodo.3828935>.  
1451
- 1452 [69] Biewald, L. Experiment tracking with weights and biases (2020). URL [https:](https://www.wandb.com/)  
1453 [//www.wandb.com/](https://www.wandb.com/). Software available from wandb.com.  
1454
- 1455 [70] Edgar, R. C. Search and clustering orders of magnitude faster than BLAST.  
1456 *Bioinformatics* **26**, 2460–2461 (2010). URL [http://dx.doi.org/10.1093/bioinfo](http://dx.doi.org/10.1093/bioinformatics/btq461)  
1457 [matics/btq461](http://dx.doi.org/10.1093/bioinformatics/btq461).  
1458
- 1459 [71] Mistry, J., Finn, R. D., Eddy, S. R., Bateman, A. & Punta, M. Challenges  
1460 in homology search: HMMER3 and convergent evolution of coiled-coil regions.  
1461 *Nucleic Acids Research* **41**, e121 (2013). URL [http://dx.doi.org/10.1093/nar/g](http://dx.doi.org/10.1093/nar/gkt263)  
1462 [kt263](http://dx.doi.org/10.1093/nar/gkt263).  
1463
- 1464 [72] Edgar, R. C. MUSCLE: multiple sequence alignment with high accuracy and  
1465 high throughput. *Nucleic Acids Research* **32**, 1792–1797 (2004). URL [http:](http://dx.doi.org/10.1093/nar/gkh340)  
1466 [//dx.doi.org/10.1093/nar/gkh340](http://dx.doi.org/10.1093/nar/gkh340).  
1467
- 1468 [73] Hopf, T. A. *et al.* The EVcouplings Python framework for coevolutionary  
1469 sequence analysis. *Bioinformatics* **35**, 1582–1584 (2019). URL [http://dx.doi.org](http://dx.doi.org/10.1093/bioinformatics/bty862)  
1470 [/10.1093/bioinformatics/bty862](http://dx.doi.org/10.1093/bioinformatics/bty862).  
1471
- 1472 [74] Shin, J.-E. *et al.* Protein design and variant prediction using autoregressive generative models. *Nature Communications* **12**, 2403 (2021). URL [http://dx.doi.org](http://dx.doi.org/10.1038/s41467-021-2403-2)



|                                                                                                                                                                                                                                                                                                                                                                                        |      |
|----------------------------------------------------------------------------------------------------------------------------------------------------------------------------------------------------------------------------------------------------------------------------------------------------------------------------------------------------------------------------------------|------|
| <a href="https://doi.org/10.1038/s41467-021-22732-w">rg/10.1038/s41467-021-22732-w</a> .                                                                                                                                                                                                                                                                                               | 1473 |
|                                                                                                                                                                                                                                                                                                                                                                                        | 1474 |
| [75] Rives, A. <i>et al.</i> Biological structure and function emerge from scaling unsupervised learning to 250 million protein sequences. <i>Proceedings of the National Academy of Sciences of the United States of America</i> <b>118</b> (2021). URL <a href="http://www.pnas.org/lookup/doi/10.1073/pnas.2016239118">http://www.pnas.org/lookup/doi/10.1073/pnas.2016239118</a> . | 1475 |
|                                                                                                                                                                                                                                                                                                                                                                                        | 1476 |
|                                                                                                                                                                                                                                                                                                                                                                                        | 1477 |
|                                                                                                                                                                                                                                                                                                                                                                                        | 1478 |
|                                                                                                                                                                                                                                                                                                                                                                                        | 1479 |
| [76] Zhang, Y. & Skolnick, J. TM-align: a protein structure alignment algorithm based on the TM-score. <i>Nucleic Acids Research</i> <b>33</b> , 2302–2309 (2005). URL <a href="http://dx.doi.org/10.1093/nar/gki524">http://dx.doi.org/10.1093/nar/gki524</a> .                                                                                                                       | 1480 |
|                                                                                                                                                                                                                                                                                                                                                                                        | 1481 |
|                                                                                                                                                                                                                                                                                                                                                                                        | 1482 |
|                                                                                                                                                                                                                                                                                                                                                                                        | 1483 |
| [77] Ingraham, J., Garg, V., Barzilay, R. & Jaakkola, T. Generative models for graph-based protein design. <i>Advances in Neural Information Processing Systems</i> (2019). URL <a href="https://papers.nips.cc/paper/2019/hash/f3a4ff4839c56a5f460c88cce3666a2b-Abstract.html">https://papers.nips.cc/paper/2019/hash/f3a4ff4839c56a5f460c88cce3666a2b-Abstract.html</a> .            | 1484 |
|                                                                                                                                                                                                                                                                                                                                                                                        | 1485 |
|                                                                                                                                                                                                                                                                                                                                                                                        | 1486 |
|                                                                                                                                                                                                                                                                                                                                                                                        | 1487 |
|                                                                                                                                                                                                                                                                                                                                                                                        | 1488 |
|                                                                                                                                                                                                                                                                                                                                                                                        | 1489 |
|                                                                                                                                                                                                                                                                                                                                                                                        | 1490 |
|                                                                                                                                                                                                                                                                                                                                                                                        | 1491 |
|                                                                                                                                                                                                                                                                                                                                                                                        | 1492 |
|                                                                                                                                                                                                                                                                                                                                                                                        | 1493 |
|                                                                                                                                                                                                                                                                                                                                                                                        | 1494 |
|                                                                                                                                                                                                                                                                                                                                                                                        | 1495 |
|                                                                                                                                                                                                                                                                                                                                                                                        | 1496 |
|                                                                                                                                                                                                                                                                                                                                                                                        | 1497 |
|                                                                                                                                                                                                                                                                                                                                                                                        | 1498 |
|                                                                                                                                                                                                                                                                                                                                                                                        | 1499 |
|                                                                                                                                                                                                                                                                                                                                                                                        | 1500 |
|                                                                                                                                                                                                                                                                                                                                                                                        | 1501 |
|                                                                                                                                                                                                                                                                                                                                                                                        | 1502 |
|                                                                                                                                                                                                                                                                                                                                                                                        | 1503 |
|                                                                                                                                                                                                                                                                                                                                                                                        | 1504 |
|                                                                                                                                                                                                                                                                                                                                                                                        | 1505 |
|                                                                                                                                                                                                                                                                                                                                                                                        | 1506 |
|                                                                                                                                                                                                                                                                                                                                                                                        | 1507 |
|                                                                                                                                                                                                                                                                                                                                                                                        | 1508 |
|                                                                                                                                                                                                                                                                                                                                                                                        | 1509 |
|                                                                                                                                                                                                                                                                                                                                                                                        | 1510 |
|                                                                                                                                                                                                                                                                                                                                                                                        | 1511 |
|                                                                                                                                                                                                                                                                                                                                                                                        | 1512 |
|                                                                                                                                                                                                                                                                                                                                                                                        | 1513 |
|                                                                                                                                                                                                                                                                                                                                                                                        | 1514 |
|                                                                                                                                                                                                                                                                                                                                                                                        | 1515 |
|                                                                                                                                                                                                                                                                                                                                                                                        | 1516 |
|                                                                                                                                                                                                                                                                                                                                                                                        | 1517 |
|                                                                                                                                                                                                                                                                                                                                                                                        | 1518 |
